## 34 Highlights

35

36 • In *C. elegans*, ATG-9 is delivered to presynaptic sites in vesicles generated

37 from the trans-Golgi network via AP-3-dependent budding

38 • ATG-9 vesicles undergo activity-dependent exo-endocytosis at presynaptic

39 sites

40 • Mutations in endocytic proteins, including a mutation associated with

41 Parkinson's disease, result in abnormal ATG-9 accumulation at clathrin-rich

42 foci

43 • Abnormal accumulation of ATG-9 at clathrin-rich foci is associated with

44 defects in activity-dependent presynaptic autophagy

45

## 46 Keywords

47 Autophagy, endocytosis, neuronal activity, synaptic vesicle cycle, ATG-9, AP-3,

48 Golgi apparatus, synaptojanin-1/UNC-26, clathrin, Parkinson's disease

49

50

51

52

53

54

## 55 **Summary**

56           Autophagy is a cellular degradation pathway essential for neuronal health  
57 and function. Autophagosome biogenesis occurs at synapses, is locally regulated  
58 and increases in response to neuronal activity. The mechanisms that couple  
59 autophagosome biogenesis to synaptic activity remain unknown. In this study we  
60 determine that trafficking of ATG-9, the only transmembrane protein in the core  
61 autophagy pathway, links the synaptic vesicle cycle with autophagy. ATG-9  
62 positive vesicles in *C. elegans* are generated from the trans-Golgi network via AP3-  
63 dependent budding, and delivered to presynaptic sites. At presynaptic sites, ATG-  
64 9 undergoes exo-endocytosis in an activity-dependent manner. Mutations that  
65 disrupt endocytosis, including one associated with Parkinson's disease, result in  
66 abnormal ATG-9 accumulation at clathrin-rich synaptic foci and defects in activity-  
67 dependent presynaptic autophagy. Our findings uncover regulated key steps of  
68 ATG-9 trafficking at presynaptic sites, and provide evidence that ATG-9 exo-  
69 endocytosis couples autophagosome biogenesis at presynaptic sites with the  
70 activity-dependent synaptic vesicle cycle.

71

## 72 **Introduction**

73           Macroautophagy (herein called autophagy) is an evolutionarily conserved  
74 cellular degradative process that is essential for neuronal physiology and survival  
75 (Son et al., 2012, Stavoe and Holzbaur, 2019, Azarnia Tehran et al., 2018, Kulkarni  
76 et al., 2018, Liang and Sigrist, 2018, Menzies et al., 2017, Vijayan and Verstreken,  
77 2017, Menzies et al., 2015, Tsukada and Ohsumi, 1993, Yorimitsu and Klionsky,  
78 2005). Neurons are particularly vulnerable to dysfunctional organelles and  
79 damaged proteins due to their post-mitotic nature, their polarized morphology and  
80 their high metabolic activity states during neuronal stimulation. Autophagy is  
81 regulated to cater to these neurophysiological needs. For example, local  
82 autophagosome biogenesis occurs near synapses and autophagosome  
83 biogenesis is coupled to the neuronal activity state (Bunge, 1973, Soukup et al.,  
84 2016, Maday et al., 2012, Stavoe et al., 2016, Katsumata et al., 2010, Shehata et  
85 al., 2012, Hill et al., 2019). Disruption of synaptic autophagy has been associated  
86 with the accumulation of damaged proteins and organelles, synaptic dysfunction  
87 and neurodegenerative diseases, including Parkinson's disease (Hoffmann et al.,  
88 2019, Hill et al., 2019, Lynch-Day et al., 2012, Zavodszky et al., 2014, Karabiyik et  
89 al., 2017, Cheung and Ip, 2009).

90           Molecules that regulate synaptic transmission and function, including  
91 proteins involved in synaptic vesicle exo-endocytosis, were reported to regulate  
92 autophagy at presynaptic sites (Soukup et al., 2016, George et al., 2016,  
93 Vanhauwaert et al., 2017, Murdoch et al., 2016, Kononenko et al., 2017, Binotti et  
94 al., 2015). For example, in *Drosophila*, endophilin A, a protein mainly known for its

95 role in endocytosis, was proposed to directly regulate autophagosome formation  
96 by inducing curved membranes that can recruit autophagic machinery (Soukup et  
97 al., 2016, Milosevic et al., 2011). Synaptojanin 1, a phosphoinositide phosphatase  
98 implicated in the endocytic recycling of synaptic vesicles (Cremona et al., 1999,  
99 Verstrecken et al., 2003, Harris et al., 2000), was also reported to play roles in the  
100 control of synaptic autophagy in zebrafish and *Drosophila* (Vanhouwaert et al.,  
101 2017, George et al., 2016). Recent studies have revealed links between these  
102 canonical endocytic proteins and early-onset parkinsonism (EOP), suggesting a  
103 relationship between the synaptic vesicle cycle (which is tied to synaptic activity),  
104 autophagy and neurodegenerative diseases (Vidyadhara et al., 2019, Trinh and  
105 Farrer, 2013, Alegre-Abarrategui and Wade-Martins, 2009, Bandres-Ciga et al.,  
106 2019, Schreij et al., 2016, Quadri et al., 2013, Krebs et al., 2013). Yet, the  
107 mechanistic links underlying the coupling between synaptic activity and  
108 autophagosome formation remain unknown.

109 In this study we examined the dynamics of ATG-9, the only transmembrane  
110 protein of the core autophagy machinery, at synapses of *C. elegans* and  
111 mammalian neurons. ATG-9 is thought to promote local autophagosome  
112 biogenesis through its role as a lipid scramblase that cooperates with the lipid  
113 transport protein ATG2 in the nucleation of the isolation membrane in nascent  
114 autophagosomes (Karanasios et al., 2016, Reggiori et al., 2005, Reggiori et al.,  
115 2004, Sawa-Makarska et al., 2020, Guardia et al., 2020, Matoba et al., 2020,  
116 Matoba and Noda, 2020, Maeda et al., 2020, Gomez-Sanchez et al., 2018). We  
117 find that at synapses, ATG-9 links the synaptic vesicle cycle to autophagy.

118 Specifically, we observe that in *C. elegans* neurons, ATG-9 is delivered to  
119 presynaptic sites in vesicles generated by the trans-Golgi network (TGN) via AP-  
120 3-dependent budding. At presynaptic sites, ATG-9 positive vesicles undergo exo-  
121 endocytosis in a synaptic activity-dependent manner. Mutants that disrupt synaptic  
122 endocytic traffic, including a *synaptojanin 1/unc-26* allele that mimics a Parkinson  
123 disease mutation, result in abnormal accumulation of ATG-9 in clathrin-rich foci,  
124 and defects in activity-dependent synaptic autophagy. Mutations that affect  
125 autophagosome biogenesis also result in abnormal accumulations of ATG-9 in  
126 clathrin-rich foci, further suggesting a relation between endocytic trafficking of  
127 ATG-9 and nucleation of autophagosomes at presynaptic sites. In mammalian  
128 hippocampal neurons, mutations in endocytic proteins similarly result in abnormal  
129 ATG9 accumulation in nerve terminals, indicating conserved mechanisms of ATG-  
130 9 trafficking at synapses. Collectively our studies identify the regulated dynamics  
131 of ATG-9 trafficking at presynaptic sites and provide insight into mechanisms that  
132 couple the synaptic vesicle cycle (related to synaptic activity) to presynaptic  
133 autophagy.

134

## 135 **Results**

136

137 **In *C. elegans* ATG-9 is transported to synapses in vesicles generated in the**  
138 **trans-Golgi network (TGN) via AP-3-dependent budding.**

139 Autophagy occurs at presynaptic sites in response to synaptic activity, and  
140 transmembrane protein ATG-9 plays a critical role in local synaptic autophagy

141 (Stavoe et al., 2016, Hill et al., 2019, Soukup et al., 2016, Wang et al., 2015,  
142 Shehata et al., 2012). To understand the dynamics of ATG-9 at presynaptic sites,  
143 we first examined the *in vivo* localization of ATG-9 in the AIY interneurons of *C.*  
144 *elegans*. AIYs are a pair of bilaterally symmetric interneurons which display a  
145 stereotypical distribution of presynaptic specializations along their neurites ((White  
146 et al., 1986, Colon-Ramos et al., 2007); (Figures 1A-1B)). Simultaneous  
147 visualization of the presynaptic marker mCherry::RAB-3 and ATG-9::GFP revealed  
148 that ATG-9 localization in neurons is discrete, compartmentalized and enriched at  
149 subcellular structures in the cell body and at presynaptic regions ((Stavoe et al.,  
150 2016); (Figures 1C-1F, 1C')).

151 To identify ATG-9 positive structures at synapses, we performed post-  
152 embedding immunogold electron microscopy of transgenic animals expressing  
153 ATG-9::GFP, by using antibodies directed against GFP. We observed that the  
154 majority of the immunogold particles (75%) localized to the presynaptic areas  
155 occupied by synaptic vesicles, with occasional localization of gold particles on the  
156 plasma membrane (<10%) (Figures 1G, S1A-S1D). However, the distribution of  
157 immunogold particles was generally non-homogeneous in the synaptic vesicle-  
158 positive areas. Accordingly, comparison by light microscopy with the localization  
159 of mCherry::RAB-3 and of a well-established synaptic vesicle integral membrane  
160 protein, SNG-1::BFP, revealed strong colocalization between mCherry::RAB-3  
161 and SNG-1::BFP, but subtle differences between the colocalization of these two  
162 proteins and ATG-9::GFP (Figures 1H-1K), consistent with ATG-9 being enriched  
163 on a subpopulation of vesicles.

164 To determine the site of ATG-9 localization within the cell soma, we co-  
165 expressed either ATG-9::mCherry or ATG-9::GFP with other organelle markers  
166 (Reggiori et al., 2005, Karanasios et al., 2016, van der Vaart and Reggiori, 2010,  
167 Puri et al., 2013). We observed that ATG-9::GFP was concentrated at sites that  
168 overlapped with trans-Golgi marker TGN-38::mCherry and that ATG-9::mCherry  
169 was directly adjacent to the medial/cis-Golgi marker AMAN-2::GFP, but did not  
170 overlap with other organelles markers (Figures 1L-1R, 1L', S1E-S1K). These  
171 findings, which are consistent with observations from yeast and mammalian culture  
172 cells (Noda, 2017, Webber et al., 2007, Ohashi and Munro, 2010), indicate a trans-  
173 Golgi-specific enrichment of ATG-9 in the neuronal cell body.

174 The trans-Golgi network (TGN) is where vesicles destined for transport to  
175 distinct subcellular locations are packaged. Coat protein complexes such as  
176 members of the heterotetrameric family of adaptor proteins (APs) regulate this  
177 process by sorting cargoes into distinct vesicular carriers (Park and Guo, 2014,  
178 Nakatsu and Ohno, 2003, Mattera et al., 2017, Badolato and Parolini, 2007,  
179 Dell'Angelica et al., 1997). In vertebrate, AP-4 is particularly important in exporting  
180 transmembrane protein ATG9A from the Golgi apparatus, leading to neurological  
181 disorders (Yamamoto et al., 2012, De Pace et al., 2018, Mattera et al., 2017). In  
182 *C. elegans* and other invertebrates, however, no orthologues of AP-4 have been  
183 characterized. Which proteins are then required for the biogenesis of ATG-9  
184 positive vesicles?

185 We tested mutants for AP complexes UNC-101/AP-1, DPY-23/AP-2 and  
186 AP-3 (Park and Guo, 2014, Nakatsu and Ohno, 2003) and did not observe



187 abnormal localization of ATG-9 in loss-of-function alleles of *unc-101(m1)/ap-1* or  
188 *dpy-23(e840)/ap-2* (data not shown). However, a putative null allele for *apb-*  
189 *3(ok429)*, a gene encoding a subunit of the AP-3 complex, displayed a reduction  
190 of ATG-9 at synapses (Figures 1S-1U, 1X). The AP-3 complex comprises four  
191 subunits - *apb-3/β3-adaptin*, *apd-3/δ-adaptin*, *apm-3/μ3* and *aps-3/σ3*. Putative  
192 null alleles for the three AP-3 complex subunits (*apb-3/β3-adaptin*, *apm-3/μ3*, *apd-*  
193 *3/δ-adaptin*) resulted in enrichment of ATG-9 at the cell body (Figure 1Y).  
194 Interestingly, these alleles did not affect the localization of the synaptic vesicle  
195 proteins SNG-1 or RAB-3 to presynaptic sites, suggesting that the observed  
196 decrease of ATG-9 at synapses is not due to a general problem in synaptic vesicle  
197 biogenesis (Figures 1V-1W, 1Z, S1L-S1O). Together, our findings reveal that *in*  
198 *vivo* in *C. elegans* neurons, enrichment of ATG-9 at presynaptic sites results from  
199 AP-3 mediated export of ATG-9 positive vesicles at the TGN.

200

### 201 **ATG-9 undergoes exo-endocytosis at presynaptic sites.**

202 The concentration of ATG-9 on vesicles at presynaptic sites and its  
203 occasional localization in the axonal plasma membrane raised the possibility that  
204 this protein may be a component of vesicles that undergo exo-endocytosis. To  
205 address this possibility, we imaged ATG-9 synaptic localization in *C. elegans*  
206 neurons in mutants with disrupted exo-endocytic traffic at presynaptic sites (Harris  
207 et al., 2000, Watanabe et al., 2014, Sudhof, 1995, Saheki and De Camilli, 2012)  
208 (Figure 2A). We observed that endocytic mutants *unc-26(e205)/synaptojanin 1*,  
209 *unc-57(ok310)/endophilin A*, *unc-11(e47)/AP180* and temperature-sensitive *dyn-*

210 *1(ky51)* displayed defects in ATG-9 localization at synapses (Figures 2B-2H). For  
211 example, in the AIY interneuron presynaptic-rich region (termed Zone 2; (Colon-  
212 Ramos et al., 2007)), the ATG-9::GFP signal is predominantly concentrated in a  
213 homogenous manner across this presynaptic area (Figures 1E, 1K, 2B-2B', 2C).  
214 However, in all the endocytic mutants examined, most animals display abnormal  
215 accumulation of ATG-9::GFP into multiple subsynaptic foci (Figures 2D-2H, 2SA-  
216 B). To quantify the genetic expressivity of the phenotype, we defined an index for  
217 ATG-9 mislocalization (briefly, the index was defined as the number of local signal  
218 peaks divided by their width, see STAR Methods). We found that in the endocytic  
219 mutants there was a significant difference in the subsynaptic localization of ATG-  
220 9, with ATG-9 abnormally enriched at discrete foci within the presynaptic regions  
221 (Figure 2K).

222 Are endocytic proteins acting cell autonomously in neurons to regulate  
223 ATG-9 subsynaptic localization? To address this question, we focused on UNC-  
224 26/synaptojanin-1. Expressing *unc-26* cDNA cell specifically in the AIY  
225 interneurons of *unc-26(e205)* mutants rescued ATG-9 defects at the synapse,  
226 indicating that UNC-26 acts cell autonomously in neurons to prevent abnormal  
227 ATG-9 accumulation at subsynaptic foci (Figures S2C-S2E).

228 If the accumulation of ATG-9 at abnormal foci in endocytic mutants is due  
229 to abnormal endocytic traffic, then mutants in exocytosis should suppress this  
230 phenotype. To test this hypothesis, we examined putative null alleles *unc-*  
231 *13(s69)/Munc13* and *unc-18(e81)/Munc18*, which encode essential components  
232 of synaptic vesicle exocytosis (Hata et al., 1993, Richmond et al., 1999). Single

233 mutants of *unc-13(s69)* and *unc-18(e81)* did not disrupt ATG-9 localization  
234 (Figures S2A, S2F-S2G). Importantly, double mutants of *unc-13(s69);unc-*  
235 *26(e205)* and *unc-18(e81);unc-26(s1710)* suppressed the *unc-26/synaptojanin 1*  
236 phenotype, indicating that the accumulation of ATG-9 at abnormal foci depends on  
237 synaptic vesicle exocytosis (Figures 2I-2K, S2A).

238 Our genetic perturbations in *C. elegans* are consistent with ATG-9 positive  
239 vesicles undergoing exo-endocytosis at presynaptic sites. To better examine this,  
240 we imaged ATG-9 dynamics in a loss-of-function allele of phosphofructokinase  
241 *1/pfk-1.1(gk922689)*. The absence of phosphofructokinase, like the absence of  
242 other glycolytic proteins, results in impaired synaptic vesicle endocytosis during  
243 transient hypoxia (Jang et al., 2016). Through the use of a microfluidic device that  
244 allows precise control of transient cycles of normoxia and hypoxia, we can  
245 temporally control the endocytic reaction (Jang et al., 2020). We examined ATG-9  
246 localization in the synaptic Zone 3 region (Figure L-L'), in which we can observe  
247 discrete and interspersed presynaptic specializations (compare to the Zone 2  
248 region (Figure 2B-B'), which consists of one large and continuous presynaptic  
249 area). Visualization of ATG-9 in the Zone 3 region enabled us to determine local  
250 ATG-9 dynamics due to transient inhibition of endocytosis. We observed that in  
251 *pfk-1.1(gk922689)* mutants, transient inhibition of endocytosis during transient  
252 hypoxia correlated with changes in ATG-9 localization: namely, ATG-9 relocalized  
253 from discrete presynaptic clusters in the synaptic Zone 3 region, to a more diffuse  
254 distribution, consistent with what would be expected if ATG-9 were trapped at the  
255 plasma membrane due to short-term defects in endocytosis. Conversely, removing

256 the endocytic block by shifting to normoxia rescued the localization of ATG-9 to  
257 the presynaptic clusters (Figures 2L-2M). Together, our data indicate that ATG-9  
258 positive vesicles undergo exo-endocytosis at presynaptic sites by using the  
259 synaptic vesicle cycling machinery.

260

261 **ATG-9 mislocalization phenotypes are enhanced under conditions that**  
262 **increase AIY activity-state.**

263 We next examined if the mislocalization phenotype of ATG-9 could be  
264 modified based on physiologically relevant stimuli known to increase the activity  
265 state of the neuron, and known to increase synaptic autophagy (Hill et al., 2019).  
266 AIY neurons in *C. elegans* are part of the thermotaxis circuit, which allows animals  
267 to navigate towards their cultivation temperature, and the activity state of AIY  
268 increases based on the cultivation temperature at which the organism is reared  
269 (Clark et al., 2006, Hawk et al., 2018). At higher cultivation temperatures, AIY  
270 displays increases in activity-dependent synaptic autophagy (Hill et al., 2019).

271 We observed that the penetrance of the ATG-9 phenotype in *unc-*  
272 *26(s1710)/synaptojanin 1* mutants similarly varied depending on the cultivation  
273 temperature of the animals. At higher cultivation temperatures, known to increase  
274 the activity state of AIY and synaptic autophagy, we observed a higher percentage  
275 of *unc-26(s1710)/synaptojanin 1* mutant animals displaying abnormal ATG-9 foci  
276 at synapses (Figure 2N). Moreover, temperature-dependent increases of  
277 abnormal ATG-9 foci in *unc-26(s1710)/synaptojanin 1* mutant animals were  
278 suppressed by the exocytosis mutant *unc-13(s69)* (Figure 2N).

279

280 **Biochemical evidence that ATG9 travels to and from the plasma membrane.**

281 Our results are consistent with published evidence that ATG-9 can be  
282 exposed at the cell surface and then re-internalized by endocytosis in mammalian  
283 fibroblastic cells, as revealed by immunocytochemistry following perturbation of a  
284 critical endocytic factor, dynamin, either pharmacologically or by dominant  
285 interference (Puri et al., 2013, Feng and Klionsky, 2017, Zhou et al., 2017). To  
286 obtain direct biochemical evidence for ATG9 exo-endocytosis, we performed cell  
287 surface biotinylation experiments (with Sulfo-NHS-LC-Biotin) in tamoxifen-  
288 inducible dynamin 1 and 2 double knock-out (DKO) mouse fibroblasts (Ferguson  
289 et al., 2009). A pool of ATG9A, and of transferrin receptor as a control, was  
290 detected at the plasma membrane in control fibroblasts, and these pools were  
291 enhanced (Figures 3A-3C) in fibroblasts where the expression of dynamin 1 and 2  
292 had been suppressed by tamoxifen (Figures S3A-S3B), providing biochemical  
293 evidence that ATG-9 travels to and from the plasma membrane, and that its  
294 internalization depends on endocytic proteins.

295

296 **In *unc-26/synaptojanin 1* mutants, ATG-9 accumulates at presynaptic,**  
297 **clathrin-rich sites.**

298 What are the subsynaptic foci where ATG-9 is enriched in endocytic  
299 mutants? We first examined if ATG-9 accumulated with synaptic vesicles proteins  
300 in such foci. Defects in the endocytic pathway result in the redistribution of synaptic  
301 vesicle membrane proteins to the plasma membrane and endocytic intermediates,

302 which is reflected in a less clustered localization of intrinsic and peripheral synaptic  
303 vesicle proteins in neurites (Harris et al., 2000, Verstreken et al., 2003, Ferguson  
304 et al., 2007, Raimondi et al., 2011, Milosevic et al., 2011). Consistent with these  
305 findings, RAB-3::mCherry and SNG-1::GFP displayed diffuse localization in *unc-*  
306 *26(s1710)/synaptojanin 1* mutants (Figures S3C-S3F). These phenotypes are  
307 distinct from the ones observed for ATG-9, as SNG-1::BFP in *unc-26(s1710)*  
308 mutants failed to localize similarly to ATG-9::GFP at subsynaptic foci (Figures 3D-  
309 3F, 3M). Our data indicate that while ATG-9 undergoes exo-endocytosis at the  
310 synapse in an activity dependent manner, mutations in endocytic proteins affect  
311 ATG-9 and a *bona fide* synaptic vesicle protein differently.

312 We next examined if ATG-9 was abnormally localized to immature  
313 autophagosomes. Simultaneous imaging of ATG-9::mCherry and of the  
314 autophagosome marker, GFP::LGG-1/Atg8/GABARAP (Alberti et al., 2010, Manil-  
315 Segalen et al., 2014, Wu et al., 2015, Stavoe et al., 2016, Hill et al., 2019) in the  
316 *unc-26(s1710)/synaptojanin 1* mutants did not reveal enrichment on the same  
317 compartments. However, they sometimes appeared adjacent to each other  
318 (Figures 3G-3I, 3M).

319 Synaptojanin plays conserved roles in clathrin-mediated endocytosis, and  
320 in *C. elegans*, *Drosophila* and vertebrates, mutations in synaptojanin result in the  
321 accumulation of clathrin-coated, abnormal endocytic intermediates (Harris et al.,  
322 2000, Verstreken et al., 2003, Cremona et al., 1999, Kim et al., 2002). We  
323 examined the relationship between ATG-9 and clathrin by simultaneously imaging  
324 ATG-9::GFP and BFP::CHC-1/Clathrin Heavy Chain in the AIY interneurons of

325 wild-type animals and *unc-26(s1710)/synaptojanin 1* mutant animals. We found  
326 that in the *unc-26(s1710)* mutants, CHC-1 localized to abnormal foci at synapses  
327 (Figures 3K, S3G) and it colocalized well with ATG-9 (Figures 3J-3M). Based on  
328 previous findings (Harris et al., 2000, Cremona et al., 1999, Verstreken et al.,  
329 2003), these clathrin-rich foci at the synapses probably represent abnormal  
330 endocytic intermediates (Figures 3J-3M).

331 To sum up, ATG-9 accumulates at presynaptic clathrin-rich structures in  
332 *unc-26/synaptojanin 1* mutants.

333

334 **In autophagy mutants, ATG-9 accumulates into endocytic intermediates at**  
335 **presynaptic sites.**

336 The critical role of ATG-9 in autophagy predicts that disruption of autophagy  
337 should impact ATG-9 localization (Reggiori et al., 2004, Sekito et al., 2009, Lu et  
338 al., 2011). Thus, we also examined ATG-9 localization in mutants with disrupted  
339 autophagy (Figure 4A). In loss-of-function alleles *unc-51(e369)/ATG1*, *epg-*  
340 *9(bp320)/Atg101*, *atg-13(bp414)/epg-1* and *epg-8(bp251)/Atg14* (Crawley et al.,  
341 2019, Liang et al., 2012, Huang et al., 2013) that affect early steps of  
342 autophagosome initiation, we observed abnormal focal accumulation of ATG-9 at  
343 presynaptic sites (Figures 4B-4G). Similar to *unc-26* mutants, the abnormal focal  
344 accumulation of ATG-9::GFP in *epg-9(bp414)* autophagy mutants co-localized  
345 with clathrin heavy chain BFP::CHC-1 (Figures 4I-4K).

346 Is the abnormal localization of ATG-9 in early autophagy mutants affected  
347 under conditions of increased synaptic activity state and autophagy? We examined

348 ATG-9 in *epg-9(bp414)* mutants reared at 15°C, 20°C and 25°C, and found that  
349 the penetrance of the ATG-9 phenotype in the AIY interneurons of *epg-9(bp414)*  
350 mutants varied according to the cultivation temperature of the animals (which  
351 relates to the activity state of the AIY interneuron (Clark et al., 2006, Hawk et al.,  
352 2018); (Figure 4H)). The effects of temperature on the abnormal localization of  
353 ATG-9 to foci in autophagy mutants are similar to those observed for ATG-9 in  
354 endocytic mutants (Figure 4H and Figure 2N).

355 To then relate changes in ATG-9 localization at the synapse with activity-  
356 dependent increases in synaptic autophagy, we examined LGG-1/Atg8/GABARAP  
357 puncta in mutant backgrounds that affect exo-endocytosis at the synapse.  
358 Consistent with the previous findings (Hill et al., 2019, Hawk et al., 2018), we  
359 observed the average number of LGG-1 puncta increased when the wild type  
360 animals were cultivated at 25°C, a condition known to increase the activity state of  
361 the AIY neurons (Hawk et al., 2018) and synaptic autophagy (Hill et al., 2019)  
362 (Figure 4L, S4A-S4C). Inhibiting exocytosis (in *unc-13(s69)* mutants) or disrupting  
363 the autophagy pathway (in *atg-9(wy56)* mutants) eliminated the capacity of the  
364 neuron to increase synaptic autophagy in response to increases in the cultivation  
365 temperature (Figure 4L, S4C). We observed higher numbers of LGG-1 puncta  
366 under basal conditions in *unc-26(s1710)* mutants (Figures S4C). The LGG-1  
367 puncta in *unc-26(s1710)* mutants could not be suppressed by autophagy mutants,  
368 suggesting the increased LGG-1 puncta were not bona-fide functional  
369 autophagosomes (Figures S4C). Moreover, the LGG-1 puncta in *unc-26(s1710)*  
370 mutants did not increase in response to cultivation temperatures that increase the



371 activity state of the neuron (Figures 4L, S4C). Our findings are consistent with  
372 previous studies that provide evidence that synaptojanin 1 is important for  
373 autophagosome formation when inducing autophagy (Vanhouwaert et al., 2017).  
374 We extend these studies, now demonstrating a link between exo-endocytic traffic  
375 of ATG-9 at presynaptic sites, and activity-dependent presynaptic autophagy.

376

377 **Abnormal accumulation of ATG9A in nerve terminals of mammalian neurons**  
378 **with mutations in endocytic proteins.**

379 We next investigated whether the effect of perturbation of endocytosis on ATG9A  
380 dynamics in nerve terminals is conserved at mammalian synapses. To this end,  
381 we explored the localization of ATG9A in nerve terminals of hippocampal neuronal  
382 cultures of mice double KO for dynamin 1 and 3 (the two neuronally enriched  
383 dynamin isoforms) and KO for synaptojanin 1 (SJ1) (the neuronally enriched  
384 synaptojanin isoform) (Raimondi et al., 2011, Cremona et al., 1999, Ferguson and  
385 De Camilli, 2012). Synapses of both genotypes are characterized by a massive  
386 accumulation of synaptic vesicle endocytic intermediates, endocytic pits in the  
387 case of dynamin mutants and clathrin coated vesicles in the case of synaptojanin  
388 1 mutants. This accumulation is reflected in a very robust clustering in presynaptic  
389 terminals of immunoreactive signal for endocytic factors, including clathrin, clathrin  
390 adaptors and their accessory proteins such as amphiphysin 2 (Raimondi et al.,  
391 2011, Hayashi et al., 2008, Ferguson et al., 2007, Milosevic et al., 2011).  
392 Accordingly, anti-amphiphysin 2 immunofluorescence revealed a much stronger  
393 synaptic staining in dynamin 1 and 3 DKO neurons, and in SJ1 KO neurons, than

394 in controls (Figures 5). Importantly, anti-ATG9A immunofluorescence also  
395 revealed a striking accumulation of this protein at a subset of mutant synapses  
396 relative to WT synapses (Figures 5A-5B, 5E-5F). Such hot spots of ATG9A  
397 colocalized with amphiphysin 2 immunoreactivity, confirming the synaptic  
398 localization of anti-ATG9A (Figure 5). However, the number of synaptic puncta  
399 were more numerous for amphiphysin 2 than for ATG9A, suggesting a  
400 heterogeneous localization of ATG9A at synapses, or a different impact of the  
401 perturbation of dynamin and SJ1 on ATG9A in different neurons.

402

403 **A mutation in *unc-26/synaptojanin 1* associated with early-onset**  
404 **Parkinsonism (EOP) leads to abnormal focal accumulation of ATG-9 in**  
405 **presynaptic nerve terminals.**

406 ATG-9 links autophagy, endocytosis and neuronal activity at synapses.  
407 Abnormal function of these processes, which are crucial for maintaining neuronal  
408 health and homeostasis, have been implicated in Parkinson's disease (Vidyadhara  
409 et al., 2019, Anglade et al., 1997, Lynch-Day et al., 2012). A missense mutation at  
410 an evolutionarily conserved position in the PI4P phosphatase domain of Sac1  
411 domain of SJ1 (R258Q) is associated with early-onset Parkinsonism (Quadri et al.,  
412 2013, Krebs et al., 2013). Introduction of the same mutation in mouse and  
413 *Drosophila* was reported to affect endocytic trafficking and autophagosome  
414 maturation at synapses (Cao et al., 2017, Vanhauwaert et al., 2017). The mutant  
415 position, which impairs the catalytic activity of the Sac1 domain, is conserved in *C.*  
416 *elegans* (R216Q) (Figure 6A). Does this mutation also affect ATG9A localization

417 at synapses? We addressed this question both in neuronal cultures of previously  
418 described homozygous knock-in mice with the PD mutation (SJ1<sup>RQ</sup>KI mice) (Cao  
419 et al., 2017) and in *C. elegans* in which we engineered the homozygous  
420 Parkinson's disease mutation (R216Q) via CRISPR-Cas9.

421 Immunofluorescence staining of endogenous ATG9A in hippocampal  
422 cultures generated from SJ1<sup>RQ</sup>KI mice revealed abnormal ATG9A accumulations  
423 that colocalized with focal enrichment of amphiphysin 2 foci at synapses (Figures  
424 6B-6E, 6I) and were similar to those observed in SJ1 KO neurons (Figures 5E-5H).  
425 As in the case of dynamin 1 and 3 DKO synapses and of SJ1 KO synapses  
426 (Hayashi et al., 2008, Raimondi et al., 2011), such accumulations were typically  
427 more prominent in inhibitory presynaptic GABA-ergic nerve terminals – as revealed  
428 by immunostaining for vGAT (Figures 6F-6H, 6F'-6H'), which generally have higher  
429 levels of tonic activity.

430 Likewise, in *unc-26 (R216Q)* mutant *C. elegans*, ATG-9::GFP was  
431 abnormally localized to subsynaptic foci which resembled those observed in *unc-*  
432 *26(e205)/SJ1* null alleles - and accordingly were enriched in clathrin - albeit with a  
433 lower penetrance, consistent with partial loss of function (Figures 6J-6M, S5H-  
434 S5J).

435 We also observed that the *unc-26(R216Q)* allele, contrary to the loss-of-  
436 function allele, did not produce obvious changes in the localization of the synaptic  
437 vesicle proteins SNG-1 or RAB-3 at presynaptic regions (Figures S5A-S5G),  
438 showing that *unc-26 (R216Q)* differentially affects ATG-9 localization and synaptic  
439 vesicle protein localization. These findings are consistent with *Drosophila* studies

440 indicating that the *unc-26(R216Q)* Parkinson's disease mutation impairs  
441 autophagy at the synapse (Vanhouwaert et al., 2017), and are extended to show  
442 an impact of the mutation on ATG-9 trafficking at presynaptic sites.

443 Another Sac domain-containing protein, Sac2/INPP5F (Fig. 6A), is located  
444 within a Parkinson's disease risk locus identified by genome-wide association  
445 studies (Blauwendraat et al., 2019, Nalls et al., 2014). We examined two putative  
446 null alleles of SAC-2 in *C. elegans*, *sac-2(gk927434)* and *sac-2(gk346019)*, for  
447 phenotypes in ATG-9 localization. While single mutants of *sac-2* do not affect ATG-  
448 9 localization (data not shown), *sac-2(gk927434);unc-26(s1710)* and *sac-  
449 2(gk346019);unc-26(s1710)* double mutants enhance the abnormal localization of  
450 ATG-9 in *unc-26(s1710)* single null allele, suggesting that *sac-2* and *unc-  
451 26/synaptojanin 1* function synergistically in mediating ATG-9 trafficking at  
452 synapses (Figures 6N-6P). Our observations are consistent with previous findings  
453 showing that Sac2 and synaptojanin 1 have overlapping roles in the endocytic  
454 pathway at synapses (Cao et al., 2020). Importantly, our findings indicate that  
455 lesions associated with early onset Parkinsonism in endocytic mutants result in  
456 abnormal ATG-9 accumulation, suggesting a possible link between this condition,  
457 ATG-9 traffic at synapses and autophagy.

458

## 459 **Discussion**

460 In *C. elegans*, ATG-9 exits the Golgi complex in an AP-3 dependent  
461 manner. We had previously shown that ATG-9, the only intrinsic transmembrane  
462 protein of the autophagy machinery, is transported by UNC-104/KIF1A to

463 presynaptic nerve terminals, where it plays a critical role for synaptic  
464 autophagosome formation (Stavoe et al., 2016). Here we show that AP-3 is a  
465 critical component of the coat that sorts ATG-9 in the vesicles targeted to  
466 presynaptic sites in *C. elegans*. The *C. elegans* AP-3 protein complex is  
467 structurally and mechanistically related to the mammalian AP-4 complex, which in  
468 vertebrates is required for signal-mediated transport of ATG9 from the TGN to the  
469 peripheral cytoplasm (Rout and Field, 2017, Dell'Angelica, 2009). Invertebrates,  
470 including *C. elegans*, do not have AP-4 complexes. Whether AP-3 has a role for  
471 ATG-9 export from the Golgi complex in mammalian cells remains to be explored.

472 ATG-9 enriched vesicles at the synapse might represent a distinct  
473 subpopulation of vesicles. In nerve terminals, as shown by our EM analyses, the  
474 bulk of ATG-9 is localized in small vesicles. Interestingly, while one cannot identify  
475 molecularly distinct vesicle populations based on size and morphological  
476 appearance in EM, immunogold staining suggests a predominant concentration of  
477 ATG-9 on a subpopulation of vesicles. Likewise, fluorescent microscopy revealed  
478 only partial overlap in nerve terminals between the distribution of ATG-9 and of the  
479 intrinsic membrane protein of synaptic vesicles, SNG-1/synaptogyrin. Consistent  
480 with these findings, ATG-9 was identified by mass spectrometry in a synaptic  
481 vesicle fraction obtained by immunopurification of vesicles positive for the synaptic  
482 vesicle protein synaptophysin or by differential and Ficoll density gradient  
483 centrifugation (Boyken et al., 2013, Chantranupong et al., 2020), suggesting  
484 compositional overlap between ATG-9 vesicles and bona fide synaptic vesicles.

485           Synaptically-localized ATG-9 positive vesicles undergo exo-endocytosis.  
486 We demonstrate that their exocytosis is *unc-13/unc-18*-dependent, and that their  
487 endocytosis is affected by *dyn-1/dynamin*, *unc-26/synaptojanin*, *unc-57/endophilin*  
488 and *unc-11/AP180*, all genes required for synaptic vesicle endocytosis. In *unc-26*  
489 mutants, ATG-9 predominantly accumulates in foci which are also enriched in  
490 clathrin. The observation that loss-of-function mutations of *unc-13/unc-18*  
491 suppress the abnormal distribution of ATG-9 in endocytic mutants shows that such  
492 redistribution is the result of abnormal endocytosis after exocytosis. Consistent  
493 with these findings in *C. elegans*, in mice a robust accumulation of ATG-9 was  
494 detected in a subpopulation of neurons that harbor loss-of-function mutations in  
495 the genes that encode neuronal isoforms of dynamin and synaptojanin. These  
496 findings are also consistent with studies in non-neuronal mammalian cells showing  
497 an accumulation of ATG9 at the plasma membrane upon perturbation of dynamin-  
498 dependent endocytosis, as detected by fluorescence microscopy (Puri et al., 2013,  
499 Puri et al., 2014, Popovic and Dikic, 2014) or a cell surface biotinylation assay (this  
500 study).

501           The exo-endocytosis of ATG-9 at synapses reveals a link between synaptic  
502 vesicle traffic and autophagy. We observe that disruptions in the synaptic vesicle  
503 cycle, or autophagy, similarly result in abnormal accumulation of ATG-9 at the  
504 plasma membrane and in clathrin-rich presynaptic foci. We interpret these clathrin-  
505 rich foci to be endocytic intermediates onto which ATG-9 gets trapped in the  
506 endocytic and autophagy mutants.

507           A missense mutation in the endocytic protein synaptojanin in *C. elegans*  
508 (corresponding to human R258Q associated with early-onset parkinsonism (EOP))  
509 results in abnormal accumulation of ATG-9 in clathrin-rich synaptic foci.  
510 Synaptojanin contains two phosphatase domains: an inositol 5-phosphatase  
511 domain which has been associated with most of the roles of synaptojanin in the  
512 endocytic trafficking of synaptic vesicles, and an inositol 4-phosphate Sac1  
513 phosphatase domain, which can dephosphorylate to some extent also PI3P and  
514 PI(3,5)P<sub>2</sub>, and whose precise physiological function is less understood. The  
515 R258Q mutation, which selectively abolishes the activity of the Sac1 phosphatase  
516 domain, was shown to impair presynaptic endocytic flow, more prominently at  
517 inhibitory synapses, which have generally higher tonic activity (Cao et al., 2017),  
518 and also impair autophagy (Vanhouwaert et al., 2017). Our findings are consistent  
519 with an impact of the EOP mutation on autophagy, as we demonstrate that ATG-  
520 9 is mislocalized at synapses both in *C. elegans* harboring the homologous *unc-*  
521 *26(R216Q)* lesion and in the R258Q mutant mice. In *Drosophila*, the corresponding  
522 EOP mutation in synaptojanin also resulted in neurodegeneration (Vanhouwaert  
523 et al., 2017). In view of the role of autophagy in the control of nerve terminal health  
524 and homeostasis, the defect in autophagy may contribute to the  
525 neurodegeneration leading to EOP.

526           Together, our data support a model whereby ATG-9 couples the synaptic  
527 exo-endocytosis and autophagy (Figure 7). ATG-9 is critical for autophagosome  
528 biogenesis, and by trafficking via exo-endocytosis at presynaptic sites, ATG-9

529 could coordinate synaptic autophagy with synaptic vesicle recycling, linking  
530 synaptic autophagy to the activity state of the neuron.

531

532

### 533 **Acknowledgments**

534 We thank Erik Jorgensen (Department of Biology, the University of Utah),  
535 Kang Shen (Department of Biology, Stanford University) and Hong Zhang  
536 (Department of Cell Biology, University of Massachusetts Medical School) for  
537 providing strains and constructs. We thank Center for Cellular and Molecular  
538 Imaging, Electron Microscopy Facility at Yale Medical School for assistance with  
539 the work presented here, and Yumei Wu, Irina Kolotuev, David Hall, Maike  
540 Kittelmann and Szi-chieh Yu for advice on immunoelectron microscopy  
541 experiments. We thank current and past members of the Colón-Ramos lab for  
542 help, advice and insightful comments on the project. We thank the Caenorhabditis  
543 Genetics Center (funded by NIH Office of Research Infrastructure Programs P40  
544 OD010440) for *C. elegans* strains. S.Y. was supported by China Scholarship  
545 Council-Yale World Scholars Program. I.O. summer research was supported by  
546 Howard Hughes Medical Institute Exceptional Research Opportunities Program  
547 (HHMI ExROP) and Yale BioMed Amgen Scholars Program. Research in the  
548 P.D.C. lab was supported by the NIH (NS36251 and DA18343), the Parkinson's  
549 Foundation, the Kavli Foundation, MJFF (ASAP-000580) and a fellowship from the  
550 National Research Foundation of Korea to D.P. (2019R1A6A3A03031300).  
551 Research in the D.A.C.-R. lab was supported by NIH R01NS076558,  
552 DP1NS111778 and by an HHMI Scholar Award.



553

## 554 **Author contributions**

555 Conceptualization: S.Y., S.H. and D.A.C.-R.; methodology: S.Y., L.M., S.H., M.C.,  
556 L.S. and D.A.C.-R.; software: L.S.; investigation in *C. elegans*: S.Y., L.M., S.H.,  
557 Z.X., I.G. and I.O.; investigation in mammalian cells: D.P. and M.C.; formal  
558 analysis: S.Y., L.M. and D.P.; writing - original draft: S.Y., L.M., P.D.C. and D.A.C.-  
559 R.; writing - review and editing: S.Y., L.M., S.H., Z.X., L.S., D.P., M.C., P.D.C. and  
560 D.A.C.-R.; visualization: S.Y., L.M., D.P. and D.A.C.-R.; supervision, project  
561 administration and funding acquisition: P.D.C. and D.A.C.-R..

562

563

## 564 **Disclosure**

565 P.D.C. is a member of the scientific advisory board of Casma Therapeutics.

566

567

## 568 **Figure Legends**

569 **Fig 1. In *C. elegans* ATG-9 is transported to synapses in vesicles generated**  
570 **in the trans-Golgi network (TGN) via AP-3-dependent budding.**

571 (A) Schematic of the head of *C. elegans*, including pharynx (grey region) and the  
572 two bilaterally symmetric AIY interneurons (in black dashed box) with presynaptic  
573 regions (magenta). The synaptic-rich region is highlighted with an orange dashed  
574 square and cell bodies with a blue dashed square. In axis, A, anterior; P, posterior;  
575 L, left; R, right; D, dorsal; V, ventral.

576 (B) Schematic of a single AIY interneuron with cell body (in blue dashed square)  
577 and presynaptic regions (magenta and black arrowheads, and synaptic-rich region  
578 highlighted with an orange dashed square).

579 (C) Schematic of a cell body in the AIY interneurons, with ATG-9 localization  
580 represented in green.

581 (C') Representative confocal micrograph of ATG-9::GFP localization at the cell  
582 body of AIY in a wild-type animal (as in C, and blue dashed box in B).

583 (D-F) Representative confocal micrographs of RAB-3::mCherry (pseudo-colored  
584 magenta) (D), ATG-9::GFP (E) and a merged channels (F) in the synaptic regions  
585 of a representative wild-type AIY interneuron. The arrows and the dashed box  
586 highlight the presynaptic specializations.

587 (G) Immunogold electron microscopy of transgenic animals with panneuronal  
588 expression of ATG-9::GFP, with antibodies directed against GFP. Note that the  
589 majority of immunogold particles localize to the presynaptic areas occupied by  
590 synaptic vesicles, but not to all synaptic vesicle (see Supplementary Fig 1). Blue  
591 line, outline of neurons. Dense projections, shaded in orange. "m", mitochondria.  
592 SV, examples of synaptic vesicles. Yellow arrows point to examples of  
593 immunogold particles.

594 (H) Schematic of synaptic-rich region in the AIY interneurons

595 (I-K) Representative confocal micrographs of RAB-3::mCherry (pseudo-colored  
596 magenta) (I), SNG-1::BFP (pseudo-colored cyan) (J) and ATG-9::GFP (K) at  
597 synaptic-rich region (corresponding to H, also orange dashed box in B) in wild  
598 type.

599 (L) Schematic of the AIY interneuron cell body with Golgi labeled (as grey puncta),  
600 (L') Schematic of the Golgi apparatus with medial/cis-Golgi-specific protein AMAN-  
601 2 (magenta) and trans-Golgi-specific protein TGN-38 (red).  
602 (M-O) Confocal micrographs of AMAN-2::GFP (pseudo-colored magenta) (M),  
603 ATG-9::mCherry (pseudo-colored green) (N) and merged channels (O) in the cell  
604 body of AIY.  
605 (P-R) Confocal micrographs of TGN-38::mCherry (pseudo-colored magenta) (P),  
606 ATG-9::GFP (Q) and merged channels (R) in the cell body of AIY.  
607 (S) Schematic of an AIY interneuron with ATG-9 (green). Pre-synaptic-rich region  
608 (Zone 2) is highlighted by orange rectangle.  
609 (T-U) Confocal micrographs of ATG-9::GFP at Zone 2 in wild type (T) and *apb-*  
610 *3(ok429)* mutants (U).  
611 (V-W) Confocal micrographs of SNG-1::GFP (pseudo-colored magenta) at Zone 2  
612 in wild type (V) and *apb-3(ok429)* mutants (W).  
613 (X) Quantification of ATG-9::GFP enrichment at Zone 2 of AIY neurons in wild-type  
614 and *apb-3(ok429)* mutant animals. Error bars correspond to standard error of the  
615 mean (SEM). \*\* $p < 0.01$  by Welch's t test between wild-type and mutant  
616 animals. Each dot in the scatter plot represents a single animal.  
617 (Y) Quantification of the ratio of ATG-9 intensity at cell body / synapses of AIY  
618 neurons in wild-type, *apb-3(ok429)*, *apm-3(gk771233)* and *apd-3(gk805642)*  
619 mutant animals. Error bars represent standard error of the mean (SEM). \* $p < 0.05$ ,  
620 \*\* $p < 0.01$  and \*\*\*\* $p < 0.0001$  (between wild type and the mutants) by ordinary one-

621 way ANOVA with Dunnett's multiple comparisons test between wild-type and the  
622 mutant groups. Each dot in the scatter plot represents a single animal.

623 (Z) Quantification of ratio of SNG-1 intensity at cell body / synapses of AIY neurons  
624 in wild-type and *apb-3(ok429)* mutant animals. “ns”: not significant (between wild  
625 type and the mutants) by Welch's t test between wild-type and mutant animals.  
626 Each dot in the scatter plot represents a single animal.

627

628 Scale bars 5 $\mu$ m in (C'); 5 $\mu$ m in (D) for (D)-(F); 200nm in (G); 2 $\mu$ m in (I) for (I)-(K);  
629 2 $\mu$ m in (M) for (M)-(R); 2 $\mu$ m in (T) for (T)-(W).

630

631 **Fig 2. ATG-9 undergoes exo-endocytosis at presynaptic sites.**

632 (A) Schematic of the proteins required for the synaptic vesicle cycle examined in  
633 this study, with vertebrate and *C. elegans* gene names (Saheki and De Camilli,  
634 2012, Watanabe et al., 2014, Gan and Watanabe, 2018).

635 (B-B'') Schematic of ATG-9 localization in AIY neurons (B), enlargement of the  
636 synaptic-rich region of Zone 2 (B').

637 (C-J) Confocal micrographs of ATG-9::GFP at AIY Zone 2 in wild type (C), *unc-*  
638 *26(e205)* (D), *unc-57(ok310)* (E) and *unc-11(e47)* (F) mutants, temperature-  
639 sensitive *dyn-1(ky51)* mutants in the permissive temperature 20°C (G), in the  
640 restrictive temperature 25°C (H), *unc-13(s69);unc-26(e205)* (I) and *unc-*  
641 *18(e81);unc-26(s1710)* (J) double mutants.

642 (K) Quantification of the index of ATG-9 mislocalization (see STAR Methods) in  
643 wild type, *unc-26(s1710)*, *unc-57(ok310)*, *unc-11(e47)* mutants, *unc-13(s69);unc-*

644 *26(e205)* and *unc-18(e81);unc-26(s1710)* double mutants. Error bars show  
645 standard error of the mean (SEM). “ns” (not significant), \*\*p<0.01 and \*\*\*p<0.001  
646 (between wild type and the mutants) by ordinary one-way ANOVA with Dunnett's  
647 multiple comparisons test between wild-type and the mutant groups. Each dot in  
648 the scatter plot represents a single animal.

649 (L, L') Schematic of ATG-9 localization in AIY neurons (L), enlargement of the  
650 distal part of the neurite with synaptic clusters of Zone 3 (L').

651 (M) Confocal micrographs of ATG-9::GFP (pseudo-colored black) at AIY Zone 3 in  
652 *pfk-1.1(gk922689)* mutants prehypoxia/normoxia (left panels), after 10min of  
653 transient hypoxia (middle panels) and another iteration of 10min of normoxia (right  
654 panels). Corresponding fluorescence intensity is shown below the line scan image.

655 (N) Quantification of the percentage of animals displaying two (or more) ATG-9  
656 subsynaptic foci at AIY Zone 2 in *unc-26(s1710)* mutants raised at indicated  
657 temperatures. Higher temperatures in AIY result in increased activity state, and  
658 autophagy (Clark et al., 2006, Hawk et al., 2018, Hill et al., 2019). *unc-13(s69);unc-*  
659 *26(e205)* double mutants were also raised at 25°C and quantified. The number of  
660 animals examined in each condition is indicated by “n”. Error bars show standard  
661 error of the mean (SEM). \*\*\*\*p<0.0001 by two-tailed Fisher's exact test.

662

663 Scale bars 2µm in (C) for (C)-(J); 5µm in (M)

664

665 **Fig 3. In *unc-26/synaptojanin 1* mutants, ATG-9 accumulates at presynaptic,**  
666 **clathrin-rich sites**

667 (A-C) Surface levels of ATG9A and transferrin receptor (TfR) in control and  
668 dynamin 1 and 2 conditional double knock-out (Dyn1/2 CKO) fibroblasts.

669 (A) Immunoblots (IB) for transferrin receptor (TfR) and ATG9A of total cell extracts  
670 and of material recovered by streptavidin affinity purification following surface  
671 biotinylation.

672 (B and C) Quantification of surface / total levels of ATG9 and TfR in Dyn1/2 CKO  
673 fibroblasts relative to the control cells (CTL). Error bars show standard error of the  
674 mean (SEM). \* $p < 0.05$  and \*\* $p < 0.01$  by Student's t test.

675 (D-F) Confocal micrographs of ATG-9::GFP (D), SNG-1::BFP (pseudo-colored  
676 magenta) (E) and merged channels (F) at AIY Zone 2 in *unc-26(s1710)* mutants.

677 (G-I) Confocal micrographs of ATG-9::mCherry (pseudo-colored green) (G),  
678 GFP::LGG-1 (pseudo-colored magenta) (H) and merged channels (I) in *unc-*  
679 *26(s1710)* mutants.

680 (J-L) Confocal micrographs of ATG-9::GFP (J), BFP::clathrin heavy chain (CHC-  
681 1) (pseudo-colored magenta) (K) and merged (L) in *unc-26(s1710)* mutants.

682 (M) Percentage of ATG-9 foci that colocalize with LGG-1, the synaptic-vesicle  
683 associated transmembrane protein Synaptogyrin/SNG-1 and CHC-1 puncta. The  
684 number of foci examined in each condition are indicated by the "n". Error bars show  
685 standard error of the mean (SEM). \*\* $p < 0.01$  by two-tailed Fisher's exact test.

686

687 Scale bars 2 $\mu$ m in (D) for (D)-(L).

688

689 **Fig 4. In autophagy mutants, ATG-9 accumulates into endocytic**  
690 **intermediates at presynaptic sites.**

691 (A) Schematic of the autophagosome biogenesis pathway. ATG-9 cycles between  
692 ATG-9 reservoirs and pre-autophagosomal structures (PAS) during  
693 autophagosome biogenesis (Reggiori et al., 2004, Yamamoto et al., 2012, Suzuki  
694 et al., 2001).

695 (B-F) Confocal micrographs of ATG-9::GFP at AIY Zone 2 in wild type (B), *unc-*  
696 *51(e369)/Atg1* (C), *epg-9(bp320)/Atg101* (D), *atg-13(bp414)/epg-1* (E), and *epg-*  
697 *8(bp251)/Atg14* (F) mutants.

698 (G) Quantification of percentage of animals displaying one (or more) ATG-9  
699 subsynaptic foci at AIY Zone 2 in wild type and indicated autophagy mutants. The  
700 number of animals examined in each condition is indicated by “n”. Error bars show  
701 standard error of the mean (SEM). “ns” (not significant), \* $p < 0.05$  and \*\*\*\* $p < 0.0001$   
702 (between wild type and the mutants) by two-tailed Fisher’s exact test.

703 (H) Quantification of the percentage of animals with one (or more) ATG-9  
704 subsynaptic foci at AIY Zone 2 in *epg-9(bp320)/Atg101* mutants raised at indicated  
705 temperatures. The number of animals examined in each condition is indicated by  
706 the numbers on the bars. Error bars show standard error of the mean (SEM).  
707 \* $p < 0.01$  by two-tailed Fisher’s exact test.

708 (I-K) Representative confocal micrographs of ATG-9::GFP (I), BFP::CHC-1  
709 (pseudo-colored magenta) (J) and merged channels (K) at AIY Zone 2 in *epg-*  
710 *9(bp320)/Atg101* mutants.

711 (L) Quantification of the relative number of LGG-1 puncta in the AIY neurites at  
712 20°C and at 25°C for 4 hours in wild type, *unc-13(e450)*, *atg-9(wy56)* and *unc-*  
713 *26(s1710)* mutants. As primary interneurons in the thermotaxis circuit of *C.*  
714 *elegans*, AIY activity state is found to increase when animals are raised at 25°C  
715 for 4 hours, compared with animals at 20°C (Clark et al., 2006, Hawk et al., 2018,  
716 Biron et al., 2006). For every genotype, the average number of LGG-1 puncta at  
717 25°C was normalized to the observed average at 20°C to visualize the difference  
718 between different neuronal activity state in each genotype. The average number  
719 before normalization can be seen in Supplementary Figure 4. “ns” (not significant)  
720 and \*\*\* $p < 0.001$  (between 20°C and 25°C in each genotype) by Welch’s t test.

721

722 Scale bars 2 $\mu$ m in (B) for (B)-(F); 2 $\mu$ m in (I) for (I)-(K).

723

724 **Fig 5. Abnormal accumulation of ATG9A in nerve terminals of mammalian**  
725 **neurons with mutations in endocytic proteins.**

726 (A-D) Representative images showing immunoreactivity for ATG9A (A and B) and  
727 amphiphysin2 (C and D) in DIV17 hippocampal neuronal cultures from wild type  
728 (WT) (A and C) and dynamin 1/3 double KO (Dyn1/3 KO) (B and D) newborn mice.  
729 (E-H) Representative images showing immunoreactivity for ATG9A (E and F) and  
730 amphiphysin2 (G and H) in DIV23 hippocampal neuronal cultures from wild type  
731 (WT) (E and G) and synaptojanin1 KO (SJ1 KO) (F and H) newborn mice.

732

733 Scale bars 20 $\mu$ m in (C), (D), (G), (H) for (A)-(H).



734

735 **Fig 6. A mutation in *unc-26/synaptojanin 1* associated with early-onset**  
736 **Parkinsonism (EOP) leads to abnormal focal accumulation of ATG-9 in**  
737 **presynaptic nerve terminals.**

738 (A) Domain structures of *Sac2/sac-2* and *Synaptojanin 1/unc-26*. The mutated  
739 residue associated with EOP is conserved (highlighted in yellow).

740 (B-E) Representative images showing immunoreactivity for ATG9A (B and C) and  
741 amphiphysin2 (D and E) in DIV23 hippocampal neuronal cultures from newborn  
742 wild type (WT) mice (B and D) and mice harboring a EOP associated mutation in  
743 the synaptojanin1 (SJ1<sup>RQKI</sup>) gene (C and E).

744 (F-H, F'-H') Representative images showing immunoreactivity for vesicular GABA  
745 transporter (vGAT) (F), ATG9A (G) and amphiphysin2 (H) in DIV19 hippocampal  
746 neuronal cultures from SJ1<sup>RQKI</sup> newborn mice. (F'-H') enlarged images of squared  
747 regions in (F-H).

748 (I) Quantification of relative ATG9A intensity in nerve terminals of wild type (WT),  
749 SJ1<sup>RQKI</sup> and SJ1KO hippocampal neuronal cultures. n = 3 independent cultures.  
750 Error bars show standard error of the mean (SEM). \*\*p<0.01 by Student's t test.

751 (J) Quantification of abnormal ATG9 localization in *unc-26(R216Q)* and *unc-*  
752 *26(e205)* worm mutants. The bars show *C. elegans* that display two (or more)  
753 ATG-9 subsynaptic foci at Zone 2 in wild type. The number of animals examined  
754 in each condition is indicated by "n". Error bars show standard error of the mean  
755 (SEM). \*\*p<0.01 and \*\*\*\*p<0.0001 (between wild type and the mutants, and  
756 between the two mutant groups) by two-tailed Fisher's exact test.

757 (K) Schematic of an AIY interneuron with presynaptic sites (in red and  
758 arrowheaded) and Zone 2 highlighted by dashed square.

759 (L-O) Representative confocal micrographs of ATG-9::GFP at AIY Zone 2 in wild  
760 type (L), *unc-26(R216Q)* (M) mutants, *unc-26(s1710)* (N) and *sac-*  
761 *2(gk346019);unc-26(s1710)* (O) mutants.

762 (P) Quantification of the percentage of animals displaying two (or more) ATG-9  
763 subsynaptic foci at AIY Zone 2 in wild type, *unc-26(s1710)*, *sac-2(gk927434);unc-*  
764 *26(s1710)* and *sac-2(gk346019);unc-26(s1710)* mutants. The number of animals  
765 examined in each condition is indicated by the numbers on the bars. Error bars  
766 show standard error of the mean (SEM). \*\*\*\* $p < 0.0001$  by two-tailed Fisher's exact  
767 test.

768

769 Scale bars 20 $\mu$ m in (D) for (B) and (D); 20 $\mu$ m in (E) for (C) and (E); 20 $\mu$ m in (H)  
770 for (F)-(H); 5 $\mu$ m in (H') for (F')-(H'); 2 $\mu$ m in (L) for (L)-(M); 2 $\mu$ m in (N) for (N)-(O)

771

772 **Fig 7. ATG-9 traffic in neurons: a model from origin in the cell body to local**  
773 **traffic at the synapse**

774 Schematic model of ATG-9 trafficking in *C. elegans* neurons. ATG-9 vesicles  
775 originate from the trans-Golgi network via AP-3-dependent budding (*C. elegans*  
776 lacks distinct AP-3 and AP-4 adaptors). ATG-9 vesicles undergo anterograde  
777 transport to the synapses, which depends on the kinesin UNC-104/KIF1A (Stavoe  
778 et al., 2016). Once ATG-9 vesicles reach the presynaptic region, they undergo  
779 exo-endocytosis. In mutants that disrupt endocytosis, or in autophagy mutants,

780 ATG-9 accumulates into clathrin-enriched synaptic foci, and activity-dependent  
781 presynaptic autophagy is compromised. Similar mechanisms operate at  
782 mammalian nerve terminals.

783

784 **Fig S1, related to Fig 1. ATG-9 localizes to a subset of vesicles at synapses**  
785 **and does not extensively colocalize with ER or mitochondrial markers at cell**  
786 **body; RAB-3 is not affected by APB-3.**

787 (A-B) Immunogold electron microscopy of nerve terminals transgenic worms  
788 expressing ATG-9::GFP, and done with antibodies directed against GFP. Note that  
789 immunogold particles are enriched at specific presynaptic areas. The similar  
790 localization of immunoreactivity in closely adjacent sections (A) and (B) speaks  
791 against the possibility that the non-homogenous distribution of gold particles in the  
792 terminal may be a labeling artifact. Blue line, outline of the nerve terminals. Dense  
793 projections are shaded in orange. “m”, mitochondria.

794 (C) Quantification of the percentage of immunogold particles on indicated  
795 subcellular structures (vesicles, plasma membrane or mitochondria, reported as  
796 the percent of total particles in the portion of the neurite visible in the section).

797 (D) Quantification of the number of immunogold particles on subcellular structures  
798 (vesicles, plasma membrane or mitochondria) divided by area occupied by the  
799 cellular structures ( $\mu\text{m}^2$ ).

800 (E) Schematic of a cell body and organelles in the AIY interneurons.

801 (F-H) Confocal micrographs of SP12::GFP (ER marker) (F), ATG-9::mCherry (G)  
802 and merged channels (H) at the cell body of AIY.

803 (I-K) Confocal micrographs of TOMM-20::GFP (mitochondrial marker) (I), ATG-  
804 9::mCherry (J) and merged channels (K) at cell body of AIY.

805 (L) Schematic of an AIY interneuron with RAB-3 localization (red), and synaptic-  
806 rich region of Zone 2 in orange dashed box.

807 (M-O) Confocal micrographs of RAB-3::mCherry at Zone 2 in wild type (M) and  
808 *apb-3(ok429)* mutants (N), and quantification (O). Error bars show standard error  
809 of the mean (SEM). “ns”: not significant by Welch’s t test between wild-type and  
810 mutant animals. Each dot in the scatter plot represents a single animal.

811

812 Scale bars 200nm in (A) for (A)-(B) and in inset; 5 $\mu$ m in (F) for (F)-(K); 2 $\mu$ m in (M)

813 for (M)-(N)

814

815 **Fig S2, related to Fig 2. Endocytosis regulates ATG-9 localization at**  
816 **synapses.**

817 (A) Quantification of the percentage of animals displaying two (or more) ATG-9 foci  
818 at AIY Zone 2 synapses in wild type and endo-exocytic mutants. The number of  
819 animals examined in each condition is indicated by “n”. Error bars show standard  
820 error of the mean (SEM). \*\*\* $p < 0.001$  and \*\*\*\* $p < 0.0001$  by two-tailed Fisher’s exact  
821 test.

822 (B) Mean intensity of ATG-9 at AIY Zone 2 in wild type and *unc-26(s1710)* mutants.  
823 Error bars show standard error of the mean (SEM). \* $p < 0.05$  (between wild type  
824 and the mutants) by Welch’s t test. Each dot in the scatter plot represents a single  
825 animal.

826 (C-D) Confocal micrographs of ATG-9::GFP in the AIY Zone 2 for *unc-26(e205)*  
827 (C) mutants, *unc-26(e205)* mutants with UNC-26 cDNA rescue array cell-  
828 specifically expressed in AIY (D).

829 (E) Quantification of the percentage of animals displaying one (or more) ATG-9  
830 foci at the synapse-rich AIY Zone 2 in wild type, *unc-26(s1710)* mutants and *unc-*  
831 *26(s1710)* mutants with an UNC-26 cDNA rescue array cell-specifically expressed  
832 in AIY. The number of animals examined in each condition is indicated by the “n”.  
833 Error bars show standard error of the mean (SEM). “ns” (not significant),  
834 \*\*\*\* $p < 0.0001$  by two-tailed Fisher’s exact test.

835 (F-G) Confocal micrographs of ATG-9::GFP in the AIY Zone 2 in *unc-13(s69)* (F)  
836 and *unc-18(e81)* (G) mutants.

837

838 Scale bars 2 $\mu$ m in (C) for (C)-(D); 2 $\mu$ m in (F) for (F)-(G)

839

840 **Fig S3, related to Fig 3. Defects of synaptic vesicle clusters and clathrin**  
841 **heavy chain (CHC-1) in *unc-26* mutants as compared to wild type.**

842 (A) Immunoblots (IB) for dynamins in the Dyn1/2 CKO fibroblast, and controls.

843 (B) Quantification of the dynamin levels in Dyn1/2 CKO fibroblasts relative to a  
844 tubulin control, in Dyn1/2 CKO and the control cells (CTL). n = 3 independent  
845 experiments. Error bars show standard error of the mean (SEM). \*\* $p < 0.01$  by  
846 Student’s t test.

847 (C-E) Confocal micrographs of RAB-3::mCherry (pseudo-colored green) in wild  
848 type (C) and *unc-26(s1710)* mutants (D), and SNG-1::GFP (E) in the *unc-*

849 *26(s1710)* mutants. Note that like ATG-9, synaptic vesicle associated protein RAB-  
850 3 concentrates near synaptic sites in wild type animals (arrows, compare to Figure  
851 1), but unlike ATG-9, these synaptic vesicle proteins become diffusely localized in  
852 *unc-26(s1710)* mutants (consistent with observations from (Harris et al., 2000,  
853 Verstreken et al., 2003, Ferguson et al., 2007, Raimondi et al., 2011, Milosevic et  
854 al., 2011)).

855 (F) Quantification of the distribution of RAB-3 in wild type and *unc-26(s1710)*  
856 mutants for the synaptic region in C and D, and as described (STAR Methods).  
857 \*\* $p < 0.01$  (between wild type and the mutants) by Welch's t test. Each dot in the  
858 scatter plot represents a single animal.

859 (G) Quantification of CHC-1 clusters intensity at synapses per AIY neuron in wild  
860 type and *unc-26 (s1710)* mutants, and as described (STAR Methods). \* $p < 0.05$   
861 (between wild type and the mutants) by Welch's t test. Each dot in the scatter plot  
862 represents a single animal. The method described in STAR Methods.

863

864 **Fig S4, related to Fig 4. Activity-dependent autophagy at presynaptic sites.**

865 (A-B) Confocal micrographs of cytoplasmic mCherry and eGFP::LGG-1 at AIY  
866 Zone 2 in wild type (A) and *unc-26(s1710)* mutants (B). Yellow dashed lines in AIY  
867 emphasize the synaptic region, with the yellow dashed box emphasizing the  
868 synaptic-rich AIY Zone 2 region of AIY, and the white dashed line, the asynaptic  
869 region. The arrow points to autophagosomes (as visualized with eGFP::LGG-1  
870 (Alberti et al., 2010, Manil-Segalen et al., 2014, Wu et al., 2015, Stavoe et al.,  
871 2016, Hill et al., 2019)).

872 (C) Quantification of the average number of LGG-1 puncta in the AIY neurites at  
873 20°C and at 25°C for 4 hours in wild type, *unc-13(e450)*, *atg-9(wy56)*, *unc-*  
874 *26(s1710)* and *unc-26(s1710);atg-9(wy56)* mutants. The number of animals  
875 examined in each condition is indicated by the numbers on the bars. \* $p < 0.05$  and  
876 \*\*\*\* $p < 0.0001$  by ordinary one-way ANOVA with Dunnett's multiple comparisons  
877 test between wild-type and the mutant groups.

878

879 Scale bars 5 $\mu$ m in (A) for (A)-(B).

880

881 **Fig S5, related to Fig 6. The lesion associated with EOP does not affect**  
882 **localization of synaptic vesicle proteins.**

883 (A) Schematic of an AIY interneuron.

884 (B) Quantification of the distribution of SNG-1 at Zone 3 in wild type and *unc-*  
885 *26(R216Q)* mutants as described (STAR Methods). Error bars show standard error  
886 of the mean (SEM). "ns" (not significant) (between wild type and the mutants) by  
887 Welch's t test. Each dot in the scatter plot represents a single animal.

888 (C-G) Representative confocal micrographs of RAB-3::mCherry at Zone 3 in wild  
889 type (C), *unc-26(R216Q)* (D), *unc-26(s1710)* (E) mutants; SNG-1::GFP in wild type  
890 (F) and *unc-26(R216Q)* (G) mutants. The arrowheads denote the clusters at Zone  
891 3. The brackets denote the diffuse RAB-3 localization at Zone 3.

892 (H-J) Representative confocal micrographs of BFP::CHC-1 (pseudo-colored  
893 magenta) (H), ATG-9::GFP (I) and merged channels (J) at Zone 2 in *unc-*  
894 *26(R216Q)* mutants.

895

896 Scale bars 5 $\mu$ m in (C) for (C)-(G); 2 $\mu$ m in (H) for (H)-(J);

897

898

## 899 **STAR Methods**

## 900 **CONTACT INFORMATION**

901 Further information and requests for resources and reagents should be directed to

902 and will be fulfilled by the Lead Contact, Daniel A. Col3n-Ramos ([daniel.colon-](mailto:daniel.colon-ramos@yale.edu)

903 [ramos@yale.edu](mailto:daniel.colon-ramos@yale.edu)).

904

## 905 **EXPERIMENTAL MODEL AND SUBJECT DETAILS**

### 906 ***C. elegans* Strains and Genetics**

907 Worms were raised on nematode growth media plates at 20°C or room

908 temperature using OP50 *Escherichia coli* as a food source (Brenner, 1974).

909 Animals were analyzed as larva 4 (L4) stage hermaphrodites. For wild-type

910 nematodes, *C. elegans* Bristol strain N2 was used. For a full list of strains used in

911 the study, please see the KEY RESOURCES TABLE.

912

### 913 **Molecular Biology and Transgenic Lines**

914 *C. elegans* transgenic strains were created by injecting pSM vector-derived

915 plasmids (listed on KEY RESOURCES TABLE) by standard injection techniques

916 with co-injection markers punc-122::gfp and punc-122::rfp.



917 The cDNA constructs (UNC-26, TGN-38, clathrin heavy chain (CHC-1)) generated  
918 were amplified from a cDNA pool of a mixed population of *C. elegans*. Detailed  
919 sub-cloning information is available upon request.

920

## 921 **METHOD DETAILS**

### 922 ***C. elegans* CRISPR Transgenics**

923 To introduce the lesion in *unc-26*/synaptojanin 1 associated with early-onset  
924 Parkinsonism (EOP), we used CRISPR-Cas9 to substitute CGA with CAA, and  
925 generate the homozygous mutation R216Q. CRISPR transgenic strain was  
926 generated by precision genome editing method using CRISPR-Cas9 and linear  
927 repair templates, as previously described (Paix et al., 2017) and using the targeted  
928 gene crRNA (GGCACUCGAUUCAACGUAC) and repair template ssODN  
929 (GACGTGTTGCTCTAATATCTCGTCTAAGTTGTGAGCGTGTCCGGCACTCGAT  
930 TCAACGTACAAGGAGCCAATTATCTCGGAAATGTGGCTAATTCGTGCGAGAC  
931 TGAGCAATTGTTGCTTTT)

932

### 933 **Cell Autonomy and Rescue of *unc-26***

934 The *unc-26* mutant phenotype was rescued by cell specifically expressing the wild  
935 type *unc-26* cDNA under AIY-specific *ttx-3* promoter fragment (Colon-Ramos et  
936 al., 2007).

937

### 938 **Fluorescence Microscopy and Confocal Imaging**

939 We imaged *C. elegans* by using 60x CFI Plan Apo VC, NA 1.4, oil objectives on  
940 an UltraView VoX spinning disc confocal microscope and on a NikonTi-E stand  
941 (PerkinElmer) with a Hamamatsu C9100-50 camera. *C. elegans* were  
942 immobilized on a 2% agarose pad with 10mM levamisole (Sigma). Images were  
943 processed with Volocity software or Fiji.

944

#### 945 **Inhibiting Oxidative Phosphorylation Using a microfluidic-hydrogel device**

946 To inhibit oxidative phosphorylation by hypoxia, a reusable microfluidic  
947 polydimethylsiloxane (PDMS) microfluidic device was used, as described (Jang et  
948 al., 2020) while imaging ATG-9::GFP localization in *pfk-1.1(gk922689);olals34*  
949 (*pttx-3::atg-9::gfp* and *pttx-3::mCherry::rab-3*). Normoxic and hypoxic conditions  
950 were applied to animals for 10 min sequentially by alternating the flow of air and  
951 nitrogen gas, respectively. As a positive control, synaptic vesicle protein RAB-3  
952 was also imaged as reported (Jang et al., 2016) (Figure 2M).

953

#### 954 **Electron Microscopy**

955 Worms were prepared by high pressure freeze and freeze substitution as  
956 described (Rostaing et al., 2004, Manning and Richmond, 2015, Kolotuev et al.,  
957 2012). Briefly, ~10-20 worms at the L4 stage were loaded into carriers coated  
958 lightly with hexadecane (Specimen carrier Type A and B, Technotrade  
959 International) with 20% BSA and *E. coli* for high-pressure freezing (Leica EM HPM  
960 010). After freezing, samples were transferred to an AFS machine for freeze  
961 substitution (Leica EM AFS2) using a custom made workbox submerged in liquid

962 nitrogen. Samples were incubated in .1% uranyl acetate in anhydrous acetone as  
963 follows: -90C for 48 hours, temperature raised to -50C over 8 hours, held at -50C  
964 for 12 hours. Next, samples were washed with ethanol several times over 2 hours  
965 and incubated in graded concentrations of HM20 resin (Lowicryl HM20, Electron  
966 Microscopy Sciences) in ethanol (3 hours at 25% HM20 in EtOH, 3 hours in 50%,  
967 16h in 75%, 6 hours in 100% HM20). Finally, worms were embedded in HM20  
968 resin at -50C within the AFS chamber. To facilitate embedding, we used a custom-  
969 made aluminum chamber similar to that described in (Kolotuev, 2014). Carriers  
970 containing the worms were inverted onto a small square of Aclar (Sigma) and  
971 manipulated using fine needle tips to dissociate worms from the planchette. Worms  
972 were then placed onto a small drop of HM20 within a double-sided adhesive  
973 frames (Thermo Scientific) sandwiched between squares of Aclar. Thin embedding  
974 at this step was critical to see the transparent worms later during sectioning.  
975 Samples were cured under UV light for 48 hours at -50C, brought to room  
976 temperature over 14 hours, and remained under UV light for another 24 hours at  
977 room temperature.

978

979 To facilitate sectioning, fixed worms were cut from the embedded square and glued  
980 onto thin plastic blocks made using Epon resin in a Chang mold (EMS). Worms  
981 were trimmed (Diatome Trim 45) and sectioned (Diatome 4.0 Ultra) on a Leica UC7  
982 (Leica) until the desired area was identified. 500 nm thick sections were collected  
983 and stained with toluidine blue to check for the desired ROI.

984

985 The nerve ring and AIY Zone 2 were identified using anatomical landmarks  
986 described in the original *C. elegans* connectome (White et al., 1986). The nerve  
987 ring is located in the head of the animal and forms a ring of densely packed neurites  
988 around the pharynx. AIY Zone 2 synapses are positioned in a ventral bundle of  
989 neurites just posterior to the nerve ring. These synapses reside at the ventral base  
990 of the neurite bundle and form a unique humped shape with multiple dense  
991 projections. The left and right process of AIY contact one another at the posterior  
992 end of Zone 2 synapses. Chemical synapses in *C. elegans* are defined by the  
993 presence of presynaptic dense projection in the neurite.

994

995 50 nm thick sections were collected from at least one animal per genotype on  
996 nickel slot grids covered with Formvar (EMS). When possible, serial sections were  
997 collected. Antibody staining was performed within one day. Grids were incubated  
998 for 10 minutes in .15% glycine and .1M ammonium chloride in PBS, followed by  
999 incubation in blocking solution (1% BSA and 1% CWFS gelatin in PBS) for 10  
1000 minutes. Grids were then incubated in anti-GFP primary antibody diluted in 2 parts  
1001 PBS and 1 part blocking solution overnight at 4C (ab6556 1:20, Abcam) After  
1002 washing in PBS four times over 15 minutes, grids were incubated in Protein A Gold  
1003 conjugated to 10 nm particles diluted in 2 parts PBS and 1 part blocking solution  
1004 (1:75, University Medical Center Utrecht) for 30 minutes. Grids were washed again  
1005 in PBS four times over 15 minutes, followed by 5 minutes incubation in 1%  
1006 glutaraldehyde in PBS (EMS), and three quick washes on water. After drying, grids  
1007 were post stained with Reynold's lead citrate for 4 minutes, 2.5% uranyl acetate

1008 for 4 minutes, and lead citrate for 1 minute and allowed to dry at least 1 hour before  
1009 imaging.

1010

1011 Images were acquired on a FEI Tecnai Biotwin (FEI) equipped with a SIS Morada  
1012 11 megapixel CCD camera and a TALOS L120 (Thermo Fisher) equipped with a  
1013 Ceta 4k x 4k CMOS camera. For serial sections, images were aligned in z using  
1014 the TrakEM2 plugin in FIJI.

1015

### 1016 **Hippocampal Neuron Culture**

1017 Mice were maintained on the C57BL6/129 hybrid genetic background.  
1018 Heterozygous mice were mated to generate homozygous knockout or knock-in  
1019 with their littermate controls. For neuronal cultures, P0 pups were genotyped by  
1020 PCR and then hippocampi were dissected. Tissues were digested for 20 min in a  
1021 papain/HBSS solution (20 U/ml) containing DNase (20 µg/ml). Cells were  
1022 dissociated by trituration and then plated onto poly-d-lysine coated coverslips.  
1023 After 3 hours incubation, the plating medium was exchanged to complete  
1024 neurobasal medium (2% B-27 and 0.5 mM L-glutamine in neurobasal medium).  
1025 Cells were maintained at 37°C in a 5% CO<sub>2</sub> humidified incubator and the 30% of  
1026 cultured medium was replaced with new complete neurobasal medium at 4, 7 and  
1027 14 days in vitro (DIV). All adult mice for breeding were maintained on a 12 hours  
1028 light/dark cycle with standard mouse chow and water ad libitum. All research and  
1029 animal care procedures were approved by the Yale University Institutional Animal  
1030 Care and Use Committee.

1031

### 1032 **Immunofluorescence**

1033 Cultured hippocampal neurons were briefly washed in a pre-warmed tyrode (136  
1034 mM NaCl, 2.5 mM KCl, 2 mM CaCl<sub>2</sub>, 1.3 mM MgCl<sub>2</sub>, 10 mM HEPES and 10 mM  
1035 glucose) and then fixed with 4% PFA in 4% sucrose-containing 0.1M PB buffer  
1036 (pH7.3) for 15 min at RT. After fixation, cells were washed in PBS and incubated  
1037 with blocking buffer (3% BSA, 0.2% Triton X-100 in PBS) for 30 min at RT. Primary  
1038 (1 hour) and secondary antibody (45 min) incubations were subsequently  
1039 performed in the blocking buffer at RT. After washing, samples were mounted on  
1040 slides with Prolong Gold antifade reagent (Invitrogen).

1041

### 1042 **Dynamin Conditional Knockout**

1043 For the tamoxifen inducible KO, Dynamin 1/2 conditional knockout (CKO) cells  
1044 (Ferguson et al., 2009) were treated with 2 μM 4-hydroxy-tamoxifen for 2 days and  
1045 then further incubated with 300 nM 4-hydroxy-tamoxifen for 3 days. Depletion of  
1046 total dynamin levels was confirmed by western blotting.

1047

### 1048 **Surface Biotinylation**

1049 Control and dynamin 1/2 conditional KO cells were washed three times with ice-  
1050 cold PBS and incubated with ice-cold EZ-Link Sulfo-NHS-LC-Biotin (0.25 mg/ml)  
1051 in PBS for 30 min at 4 °C to label the surface proteins. Unbound biotins were  
1052 quenched and removed by 50 mM glycine in ice-cold PBS for 10 min at 4 °C. After  
1053 washout, cells were lysed with 1% triton X-100 lysis buffer (20 mM Tris-HCl, pH 8,

1054 1% triton X-100, 10% glycerol, 137 mM NaCl, 2 mM EDTA, 1 mM PMSF, 10 mM  
1055 leupeptin, 1.5 mM pepstatin and 1 mM aprotinin) and centrifuged at 14,000 g for  
1056 20 min at 4°C. The supernatants were collected, and protein concentrations were  
1057 determined by the BCA Protein Assay Kit. Same amount of lysates (600 µg) were  
1058 incubated with NeutraAvidin particles for 2 hours at 4 °C to pull-down the  
1059 biotinylated proteins. Particles were washed three times by lysis buffer, eluted with  
1060 2x sample buffer and boiling (5 min) and the eluates were processed for SDS-  
1061 PAGE and western blotting. The level of proteins were quantified by densitometry  
1062 using Fiji.

1063

## 1064 **QUANTIFICATION AND STATISTICAL ANALYSIS**

### 1065 ***C. elegans* AIY Quantifications**

#### 1066 Presynaptic Enrichment

1067 Morphologically, AIY can be divided into four segments, consistent with the *C.*  
1068 *elegans* EM reconstructions (White et al., 1986): the cell body; a proximal  
1069 asynaptic region termed Zone 1; a ~5µm synaptic-rich region termed Zone 2,  
1070 located at the turn of the neuron into the nerve ring; and Zone 3, which is the distal  
1071 part of the neurite located at the nerve ring.

1072 ATG-9 or RAB-3 enrichment at synapses was quantified in the integrated  
1073 transgenic line *olaIs34*, expressing *pttx-3::atg-9::gfp* and *pttx-3::mCherry::rab-3* in  
1074 the wild type and *apb-3(ok429)* mutants. Fluorescence intensity at Zone 2 was  
1075 quantified in Fiji (Schindelin et al., 2012) in maximal projection confocal

1076 micrographs. ATG-9 (or RAB-3) enrichment at synapses represents Zone 2 signal  
1077 subtracted by average cytoplasmic signal at the cell body (Figures 1X and S1O).  
1078 Ratio of ATG-9 intensity of cell body/synapses was quantified in *olals34* in the wild  
1079 type, *apb-3(ok429)*, *apm-3(gk771233)* and *apd-3(gk805642)* mutants. In maximal  
1080 projection confocal micrographs, fluorescence intensities were measured,  
1081 background-subtracted (from cytoplasmic signal in the cell body) and averaged for  
1082 different subcellular regions (using an identically-sized oval-shaped object). The  
1083 'Ratio between ATG-9 intensity at the cell body and synapses' represents signal  
1084 of ATG-9 intensity (after the processing) at the cell body divided by the intensity  
1085 (after the processing) at Zone 2 (as shown in the equation below; Figure 1Y).

1086 
$$\text{The ratio} = \frac{\text{ATG} - 9 \text{ intensity at cell body} - \text{cytoplasmic background}}{\text{ATG} - 9 \text{ intensity at zone 2} - \text{cytoplasmic background}}$$

1087 To quantify ratio of SNG-1 intensity of cell body/synapses, we used the  
1088 extrachromosomal line *olex4060* in the wild type and *apb-3(ok429)* mutants.  
1089 Maximal projection confocal micrographs were taken on SNG-1 and measured as  
1090 the intensity at Zone 2 by segmented line scans and the intensity at the cell body  
1091 by the oval selections of the whole cell body. The ratio of SNG-1 intensity between  
1092 cell body and synapses was reported as the intensity of SNG-1 at cell body divided  
1093 by the intensity of SNG-1 at Zone 2 (Figure 1Z).

1094

#### 1095 Penetrance of ATG-9:GFP Subsynaptic Foci at the Presynaptic Region

1096 To quantify the penetrance of ATG-9 subsynaptic foci at the presynaptic region  
1097 (Zone 2), we used integrated transgenic strain *olals34* and *olals33* in the wild type  
1098 and mutant background animals. For the temperature sensitive allele *dyn-1(ky51)*



1099 and the wild-type animals, animals were held at either 20°C (permissive) or 25°C  
1100 (non-permissive) for 3 days (or longer) prior to examination at the L4 stage. Other  
1101 mutants were kept at 20°C except for *unc-26(s1710)* and *epg-9(bp320)*  
1102 temperature experiments.

1103 The penetrance of ATG-9 subsynaptic foci was quantified as percentage of  
1104 animals showing subsynaptic foci of ATG-9:GFP at Zone 2. Mutant phenotype was  
1105 defined as two or more than two subsynaptic foci of ATG-9::GFP at Zone 2 in  
1106 endocytic mutants, or one or more than one subsynaptic foci in autophagy  
1107 mutants. A Leica DM500B compound fluorescent microscope was used to  
1108 visualize and screen the worm in different genetic backgrounds (Figures 2N, S2A,  
1109 S2E, 4G-4H, 6J, 6P).

1110

#### 1111 Expressivity of ATG-9::GFP Subsynchronic Foci at the Presynaptic Region

1112 To quantify expressivity of ATG-9 subsynaptic foci at the presynaptic region (Zone  
1113 2), we obtained the plot profiles for individual presynaptic region (Zone 2) through  
1114 segmented line scans using Fiji. An algorithm in MATLAB was designed to identify  
1115 peaks along the line scans of Zone 2. The index of ATG-9 mislocalization at  
1116 presynaptic region is defined as the number of peaks divided by the width of peaks  
1117 at Zone 2 in each individual animal. In endocytic mutants, two populations of  
1118 mutant phenotype were identified: ATG-9 is dim and diffuse at Zone 2; ATG-9  
1119 displays subsynaptic foci at Zone 2. Only endocytic mutants that display  
1120 subsynaptic foci were quantified for the expressivity (Figure 2K).

1121

1122 Code available: [https://github.com/yangsisi76/Quantify-distribution-of-cell-](https://github.com/yangsisi76/Quantify-distribution-of-cell-structures)  
1123 [structures](#).

1124

#### 1125 Mean Intensity of ATG-9 at Zone 2

1126 To measure the level of ATG-9 at presynaptic regions, we obtained the fluorescent  
1127 value for individual presynaptic region (Zone 2) through segmented line scans  
1128 using Fiji. All settings for the confocal microscope and camera were kept identical  
1129 between the wild type and *unc-26(s1710)* mutants. Mean fluorescent value of  
1130 animals in the two genotypes was calculated by Fiji (Figure S2B).

1131

#### 1132 RAB-3 and SNG-1 Enrichment at Zone 3

1133 To quantify the distribution and enrichment of synaptic proteins, such as RAB-3  
1134 and SNG-1, we used methods as described (Dittman and Kaplan, 2006, Jang et  
1135 al., 2016). Briefly, fluorescent values for the RAB-3 (SNG-1) in AIY neurons were  
1136 obtained through segmented line scans using Fiji. A sliding window of 2 $\mu$ m was  
1137 used to identify all the fluorescent peak and trough values for Zone 3 in each  
1138 individual neuron. The synaptic enrichment was calculated as  $\% \Delta F/F$  as described  
1139 (Jang et al., 2016, Dittman and Kaplan, 2006, Bai et al., 2010). In short, all the  
1140 identified fluorescent peak and trough values ( $F_{peak}$  and  $F_{trough}$ ) were averaged and  
1141 used to calculate the  $\% \Delta F/F$  ( $100 \times (F_{peak} - F_{trough}) / F_{trough}$ ) (Bai et al., 2010, Dittman  
1142 and Kaplan, 2006, Jang et al., 2016). All settings for the confocal microscope and  
1143 camera were kept identical between the wild type and *unc-26(s1710)* mutants  
1144 (Figures S3F and S5B).

1145

1146 Percentage of ATG-9 Subs synaptic Foci that Colocalize with the Subs synaptic

1147 Structures

1148 To quantify the percentage of ATG-9 subsynaptic foci that colocalize with the  
1149 subsynaptic structures (LGG-1 and CHC-1), we observed the transgenic lines  
1150 *olaex1360;olals44* (pttx-3::gfp::lgg-1, pttx-3::mCherry::atg-9) and  
1151 *olaex4290;olals34* (pttx-3::bfp::chc-1, pttx-3::atg-9::gfp). Confocal maximal  
1152 projections were used, and percentage colocalization was calculated as the  
1153 percentage of ATG-9 subsynaptic foci that colocalize with examined organelle  
1154 markers (Figure 3M).

1155

1156 Activity-dependent Autophagy

1157 To measure the synaptic autophagosomes in AIY, animals with *olals35* in the wild-  
1158 type, *unc-13(e450)*, *atg-9(wy56)*, *unc-26(s1710)* and *unc-26(s1710);atg-9(wy56)*  
1159 mutant backgrounds were grown in 20°C and then shifted to 25°C for 4 hours and  
1160 assessed for number of LGG-1 puncta in the neurite of AIY under a Leica DM  
1161 5000B compound microscope (Hill et al., 2019). To show the comparison between  
1162 20°C and 25°C, the number of LGG-1 puncta at 25°C in each genotype was  
1163 normalized by the number at 20°C (Figure 4L). Results before normalization are  
1164 reported in Figure S4C.

1165

1166 Immuno-EM

1167 To quantify the distribution of ATG-9 positive particles, animals with *olaex2264*  
1168 (*punc-14::atg-9::GFP*) in the wild type were used. Quantifications were performed  
1169 in FIJI. Cross-sectional area: an image of a 40nm section. Particles were counted  
1170 using the Cell Counter plugin. Occasionally, a Gaussian Blur processing filter was  
1171 applied in FIJI to help visualize structures in the image. Staining specificity,  
1172 calculated as a signal to noise ratio of particle density in neuronal tissue divided  
1173 by particle density in nearby *E coli* in the section, was >20 for all samples. Particles  
1174 were considered localized near vesicles, plasma membrane, or mitochondria if the  
1175 distance from the gold particle to that structure was <20 nm. This distance was  
1176 chosen based on estimates of the size of GFP, a GFP antibody, and protein A  
1177 crystal structures. To measure the area occupied by vesicles, a freehand shape  
1178 was drawn around an apparent cluster of vesicles occupying most or all vesicles  
1179 in the neurite. To measure area occupied by plasma membrane, the perimeter of  
1180 the neurite was multiplied by 40, which accounts for the rough measured width of  
1181 the plasma membrane plus the 20 nm radius in which a particle may be localized  
1182 nearby (Figures 1G, S1A-S1D).

1183

#### 1184 **Quantification of Immunoreactivity in Hippocampal Neuron Culture and** 1185 **GFP::*CHC-1* in *C. elegans***

1186 Quantification of ATG9 and CHC-1 clustering was performed using Fiji as  
1187 previously described (Cao et al., 2020). Briefly, the same threshold was applied to  
1188 all images after background subtraction and then 'analyze particles' function of Fiji

1189 was used to obtain the raw intensity values of masked regions (Figures S3G and  
1190 6I).

1191

## 1192 **Statistical Analysis**

1193 Statistical analysis and data plotting were conducted with Prism 7 software. We  
1194 used Fisher's exact test to determine statistical significance of categorical data in  
1195 contingency table, such as the penetrance of ATG-9 phenotype in AIY. 95%  
1196 confidence intervals were calculated by Wilson/Brown method and used for error  
1197 bars. For the continuous data, ordinary one-way ANOVA with Tukey's multiple  
1198 comparisons test, Welch's t test and Student's t test were used to determine its  
1199 statistical significance. The error bar represents the standard error of the mean  
1200 (SEM). The p value for significant differences is reported in the figure legends.

1201

1202

1203 Reference:

- 1204 ALBERTI, A., MICHELET, X., DJEDDI, A. & LEGOUIS, R. 2010. The  
1205 autophagosomal protein LGG-2 acts synergistically with LGG-1 in dauer  
1206 formation and longevity in *C. elegans*. *Autophagy*, 6, 622-33.
- 1207 ALEGRE-ABARRATEGUI, J. & WADE-MARTINS, R. 2009. Parkinson disease,  
1208 LRRK2 and the endocytic-autophagic pathway. *Autophagy*, 5, 1208-10.
- 1209 ANGLADE, P., VYAS, S., JAVOY-AGID, F., HERRERO, M. T., MICHEL, P. P.,  
1210 MARQUEZ, J., MOUATT-PRIGENT, A., RUBERG, M., HIRSCH, E. C. & AGID,  
1211 Y. 1997. Apoptosis and autophagy in nigral neurons of patients with Parkinson's  
1212 disease. *Histol Histopathol*, 12, 25-31.
- 1213 AZARNIA TEHRAN, D., KUIJPERS, M. & HAUCKE, V. 2018. Presynaptic  
1214 endocytic factors in autophagy and neurodegeneration. *Curr Opin Neurobiol*, 48,  
1215 153-159.
- 1216 BADOLATO, R. & PAROLINI, S. 2007. Novel insights from adaptor protein 3  
1217 complex deficiency. *J Allergy Clin Immunol*, 120, 735-41; quiz 742-3.

- 1218 BAI, J. H., HU, Z. T., DITTMAN, J. S., PYM, E. C. G. & KAPLAN, J. M. 2010.  
1219 Endophilin Functions as a Membrane-Bending Molecule and Is Delivered to  
1220 Endocytic Zones by Exocytosis. *Cell*, 143, 430-441.
- 1221 BANDRES-CIGA, S., SAEZ-ATIENZAR, S., BONET-PONCE, L., BILLINGSLEY,  
1222 K., VITALE, D., BLAUWENDRAAT, C., GIBBS, J. R., PIHLSTROM, L., GAN-OR,  
1223 Z., INTERNATIONAL PARKINSON'S DISEASE GENOMICS, C., COOKSON, M.  
1224 R., NALLS, M. A. & SINGLETON, A. B. 2019. The endocytic membrane  
1225 trafficking pathway plays a major role in the risk of Parkinson's disease. *Mov*  
1226 *Disord*, 34, 460-468.
- 1227 BINOTTI, B., PAVLOS, N. J., RIEDEL, D., WENZEL, D., VORBRUGGEN, G.,  
1228 SCHALK, A. M., KUHNEL, K., BOYKEN, J., ERCK, C., MARTENS, H., CHUA, J.  
1229 J. & JAHN, R. 2015. The GTPase Rab26 links synaptic vesicles to the autophagy  
1230 pathway. *Elife*, 4, e05597.
- 1231 BIRON, D., SHIBUYA, M., GABEL, C., WASSERMAN, S. M., CLARK, D. A.,  
1232 BROWN, A., SENGUPTA, P. & SAMUEL, A. D. 2006. A diacylglycerol kinase  
1233 modulates long-term thermotactic behavioral plasticity in *C. elegans*. *Nat*  
1234 *Neurosci*, 9, 1499-505.
- 1235 BLAUWENDRAAT, C., HEILBRON, K., VALLERGA, C. L., BANDRES-CIGA, S.,  
1236 VON COELLN, R., PIHLSTROM, L., SIMON-SANCHEZ, J., SCHULTE, C.,  
1237 SHARMA, M., KROHN, L., SIITONEN, A., IWAKI, H., LEONARD, H., NOYCE, A.  
1238 J., TAN, M., GIBBS, J. R., HERNANDEZ, D. G., SCHOLZ, S. W., JANKOVIC, J.,  
1239 SHULMAN, L. M., LESAGE, S., CORVOL, J. C., BRICE, A., VAN HILTEN, J. J.,  
1240 MARINUS, J., EEROLA-RAUTIO, J., TIENARI, P., MAJAMAA, K., TOFT, M.,  
1241 GROSSET, D. G., GASSER, T., HEUTINK, P., SHULMAN, J. M., WOOD, N.,  
1242 HARDY, J., MORRIS, H. R., HINDS, D. A., GRATTEN, J., VISSCHER, P. M.,  
1243 GAN-OR, Z., NALLS, M. A., SINGLETON, A. B., TEAM, A. R. & IPDGC 2019.  
1244 Parkinson's disease age at onset genome-wide association study: Defining  
1245 heritability, genetic loci, and alpha-synuclein mechanisms. *Movement Disorders*,  
1246 34, 866-875.
- 1247 BOYKEN, J., GRONBORG, M., RIEDEL, D., URLAUB, H., JAHN, R. & CHUA, J.  
1248 J. E. 2013. Molecular Profiling of Synaptic Vesicle Docking Sites Reveals Novel  
1249 Proteins but Few Differences between Glutamatergic and GABAergic Synapses.  
1250 *Neuron*, 78, 285-297.
- 1251 BRENNER, S. 1974. The genetics of *Caenorhabditis elegans*. *Genetics*, 77, 71-  
1252 94.
- 1253 BUNGE, M. B. 1973. Fine structure of nerve fibers and growth cones of isolated  
1254 sympathetic neurons in culture. *J Cell Biol*, 56, 713-35.
- 1255 CAO, M., WU, Y., ASHRAFI, G., MCCARTNEY, A. J., WHEELER, H.,  
1256 BUSHONG, E. A., BOASSA, D., ELLISMAN, M. H., RYAN, T. A. & DE CAMILLI,  
1257 P. 2017. Parkinson Sac Domain Mutation in Synaptojanin 1 Impairs Clathrin  
1258 Uncoating at Synapses and Triggers Dystrophic Changes in Dopaminergic  
1259 Axons. *Neuron*, 93, 882-896 e5.
- 1260 CAO, M. A., PARK, D., WU, Y. M. & DE CAMILLI, P. 2020. Absence of  
1261 Sac2/INPP5F enhances the phenotype of a Parkinson's disease mutation of  
1262 synaptojanin 1. *Proceedings of the National Academy of Sciences of the United*  
1263 *States of America*, 117, 12428-12434.

1264 CHANTRANUPONG, L., SAULNIER, J. L., WANG, W., JONES, D. R., PACOLD,  
1265 M. E. & SABATINI, B. L. 2020. Rapid purification and metabolomic profiling of  
1266 synaptic vesicles from mammalian brain. *Elife*, 9.  
1267 CHEUNG, Z. H. & IP, N. Y. 2009. The emerging role of autophagy in Parkinson's  
1268 disease. *Mol Brain*, 2, 29.  
1269 CLARK, D. A., BIRON, D., SENGUPTA, P. & SAMUEL, A. D. T. 2006. The AFD  
1270 sensory neurons encode multiple functions underlying thermotactic behavior in  
1271 *Caenorhabditis elegans*. *Journal of Neuroscience*, 26, 7444-7451.  
1272 COLON-RAMOS, D. A., MARGETA, M. A. & SHEN, K. 2007. Glia promote local  
1273 synaptogenesis through UNC-6 (netrin) signaling in *C-elegans*. *Science*, 318,  
1274 103-106.  
1275 CRAWLEY, O., OPPERMAN, K. J., DESBOIS, M., ADRADOS, I., BORGEM, M.  
1276 A., GILES, A. C., DUCKETT, D. R. & GRILL, B. 2019. Autophagy is inhibited by  
1277 ubiquitin ligase activity in the nervous system. *Nature Communications*, 10.  
1278 CREMONA, O., DI PAOLO, G., WENK, M. R., LUTHI, A., KIM, W. T., TAKEI, K.,  
1279 DANIELL, L., NEMOTO, Y., SHEARS, S. B., FLAVELL, R. A., MCCORMICK, D.  
1280 A. & DE CAMILLI, P. 1999. Essential role of phosphoinositide metabolism in  
1281 synaptic vesicle recycling. *Cell*, 99, 179-88.  
1282 DE PACE, R., SKIRZEWSKI, M., DAMME, M., MATTERA, R., MERCURIO, J.,  
1283 FOSTER, A. M., CUITINO, L., JARNIK, M., HOFFMANN, V., MORRIS, H. D.,  
1284 HAN, T. U., MANCINI, G. M. S., BUONANNO, A. & BONIFACINO, J. S. 2018.  
1285 Altered distribution of ATG9A and accumulation of axonal aggregates in neurons  
1286 from a mouse model of AP-4 deficiency syndrome. *PLoS Genet*, 14, e1007363.  
1287 DELL'ANGELICA, E. C. 2009. AP-3-dependent trafficking and disease: the first  
1288 decade. *Curr Opin Cell Biol*, 21, 552-9.  
1289 DELL'ANGELICA, E. C., OHNO, H., OOI, C. E., RABINOVICH, E., ROCHE, K.  
1290 W. & BONIFACINO, J. S. 1997. AP-3: an adaptor-like protein complex with  
1291 ubiquitous expression. *EMBO J*, 16, 917-28.  
1292 DITTMAN, J. S. & KAPLAN, J. M. 2006. Factors regulating the abundance and  
1293 localization of synaptobrevin in the plasma membrane. *Proc Natl Acad Sci U S A*,  
1294 103, 11399-404.  
1295 FENG, Y. C. & KLIONSKY, D. J. 2017. Autophagic membrane delivery through  
1296 ATG9. *Cell Research*, 27, 161-162.  
1297 FERGUSON, S. M., BRASNJO, G., HAYASHI, M., WOLFEL, M., COLLESI, C.,  
1298 GIOVEDI, S., RAIMONDI, A., GONG, L. W., ARIEL, P., PARADISE, S.,  
1299 O'TOOLE, E., FLAVELL, R., CREMONA, O., MIESENBOCK, G., RYAN, T. A. &  
1300 DE CAMILLI, P. 2007. A selective activity-dependent requirement for dynamin 1  
1301 in synaptic vesicle endocytosis. *Science*, 316, 570-574.  
1302 FERGUSON, S. M. & DE CAMILLI, P. 2012. Dynamin, a membrane-remodelling  
1303 GTPase. *Nat Rev Mol Cell Biol*, 13, 75-88.  
1304 FERGUSON, S. M., RAIMONDI, A., PARADISE, S., SHEN, H., MESAHI, K.,  
1305 FERGUSON, A., DESTAING, O., KO, G., TAKASAKI, J., CREMONA, O., E, O.  
1306 T. & DE CAMILLI, P. 2009. Coordinated actions of actin and BAR proteins  
1307 upstream of dynamin at endocytic clathrin-coated pits. *Dev Cell*, 17, 811-22.  
1308 GAN, Q. & WATANABE, S. 2018. Synaptic Vesicle Endocytosis in Different  
1309 Model Systems. *Front Cell Neurosci*, 12, 171.

- 1310 GEORGE, A. A., HAYDEN, S., STANTON, G. R. & BROCKERHOFF, S. E. 2016.  
1311 Arf6 and the 5'phosphatase of synaptojanin 1 regulate autophagy in cone  
1312 photoreceptors. *Bioessays*, 38 Suppl 1, S119-35.
- 1313 GOMEZ-SANCHEZ, R., ROSE, J., GUIMARAES, R., MARI, M., PAPINSKI, D.,  
1314 RIETER, E., GEERTS, W. J., HARDENBERG, R., KRAFT, C., UNGERMANN, C.  
1315 & REGGIORI, F. 2018. Atg9 establishes Atg2-dependent contact sites between  
1316 the endoplasmic reticulum and phagophores. *J Cell Biol*, 217, 2743-2763.
- 1317 GUARDIA, C. M., CHRISTENSON, E. T., ZHOU, W., TAN, X. F., LIAN, T.,  
1318 FARALDO-GOMEZ, J. D., BONIFACINO, J. S., JIANG, J. & BANERJEE, A.  
1319 2020. The structure of human ATG9A and its interplay with the lipid bilayer.  
1320 *Autophagy*, 1-2.
- 1321 HARRIS, T. W., HARTWIEG, E., HORVITZ, H. R. & JORGENSEN, E. M. 2000.  
1322 Mutations in synaptojanin disrupt synaptic vesicle recycling. *Journal of Cell*  
1323 *Biology*, 150, 589-599.
- 1324 HATA, Y., SLAUGHTER, C. A. & SUDHOF, T. C. 1993. Synaptic vesicle fusion  
1325 complex contains unc-18 homologue bound to syntaxin. *Nature*, 366, 347-51.
- 1326 HAWK, J. D., CALVO, A. C., LIU, P., ALMORIL-PORRAS, A., ALJOBEB, A.,  
1327 TORRUELLA-SUAREZ, M. L., REN, I., COOK, N., GREENWOOD, J., LUO, L.  
1328 J., WANG, Z. W., SAMUEL, A. D. T. & COLON-RAMOS, D. A. 2018. Integration  
1329 of Plasticity Mechanisms within a Single Sensory Neuron of *C. elegans* Actuates  
1330 a Memory. *Neuron*, 97, 356-+.
- 1331 HAYASHI, M., RAIMONDI, A., O'TOOLE, E., PARADISE, S., COLLESI, C.,  
1332 CREMONA, O., FERGUSON, S. M. & DE CAMILLI, P. 2008. Cell- and stimulus-  
1333 dependent heterogeneity of synaptic vesicle endocytic recycling mechanisms  
1334 revealed by studies of dynamin 1-null neurons. *Proc Natl Acad Sci U S A*, 105,  
1335 2175-80.
- 1336 HILL, S. E., KAUFFMAN, K. J., KROUT, M., RICHMOND, J. E., MELIA, T. J. &  
1337 COLON-RAMOS, D. A. 2019. Maturation and Clearance of Autophagosomes in  
1338 Neurons Depends on a Specific Cysteine Protease Isoform, ATG-4.2.  
1339 *Developmental Cell*, 49, 251-+.
- 1340 HOFFMANN, S., ORLANDO, M., ANDRZEJAK, E., BRUNS, C., TRIMBUCH, T.,  
1341 ROSENMUND, C., GARNER, C. C. & ACKERMANN, F. 2019. Light-Activated  
1342 ROS Production Induces Synaptic Autophagy. *J Neurosci*, 39, 2163-2183.
- 1343 HUANG, S., JIA, K., WANG, Y., ZHOU, Z. & LEVINE, B. 2013. Autophagy genes  
1344 function in apoptotic cell corpse clearance during *C. elegans* embryonic  
1345 development. *Autophagy*, 9, 138-149.
- 1346 JANG, S., NELSON, J. C., BEND, E. G., RODRIGUEZ-LAUREANO, L.,  
1347 TUEROS, F. G., CARTAGENOVA, L., UNDERWOOD, K., JORGENSEN, E. M.  
1348 & COLON-RAMOS, D. A. 2016. Glycolytic Enzymes Localize to Synapses under  
1349 Energy Stress to Support Synaptic Function. *Neuron*, 90, 278-291.
- 1350 JANG, S., XUAN, Z., LAGOY, R. C., JAWERTH, L. M., GONZALEZ, I. J.,  
1351 SINGH, M., PRASHAD, S., KIM, H. S., PATEL, A., ALBRECHT, D. R., HYMAN,  
1352 A. A. & COLON-RAMOS, D. A. 2020. Phosphofructokinase Relocalizes into  
1353 Subcellular Compartments with Liquid-like Properties In Vivo. *Biophys J*.
- 1354 KARABIYIK, C., LEE, M. J. & RUBINSZTEIN, D. C. 2017. Autophagy impairment  
1355 in Parkinson's disease. *Essays Biochem*, 61, 711-720.



1356 KARANASIOS, E., WALKER, S. A., OKKENHAUG, H., MANIFAVA, M.,  
1357 HUMMEL, E., ZIMMERMANN, H., AHMED, Q., DOMART, M. C., COLLINSON,  
1358 L. & KTISTAKIS, N. T. 2016. Autophagy initiation by ULK complex assembly on  
1359 ER tubulovesicular regions marked by ATG9 vesicles. *Nature Communications*,  
1360 7.  
1361 KATSUMATA, K., NISHIYAMA, J., INOUE, T., MIZUSHIMA, N., TAKEDA, J. &  
1362 YUZAKI, M. 2010. Dynein- and activity-dependent retrograde transport of  
1363 autophagosomes in neuronal axons. *Autophagy*, 6, 378-85.  
1364 KIM, W. T., CHANG, S. H., DANIELL, L., CREMONA, O., DI PAOLO, G. & DE  
1365 CAMILLI, P. 2002. Delayed reentry of recycling vesicles into the fusion-  
1366 competent synaptic vesicle pool in synaptojanin 1 knockout mice. *Proceedings of*  
1367 *the National Academy of Sciences of the United States of America*, 99, 17143-  
1368 17148.  
1369 KOLOTUEV, I. 2014. Positional correlative anatomy of invertebrate model  
1370 organisms increases efficiency of TEM data production. *Microsc Microanal*, 20,  
1371 1392-403.  
1372 KOLOTUEV, I., BUMBARGER, D. J., LABOUESSE, M. & SCHWAB, Y. 2012.  
1373 Targeted ultramicrotomy: a valuable tool for correlated light and electron  
1374 microscopy of small model organisms. *Methods Cell Biol*, 111, 203-22.  
1375 KONONENKO, N. L., CLASSEN, G. A., KUIJPERS, M., PUCHKOV, D.,  
1376 MARITZEN, T., TEMPES, A., MALIK, A. R., SKALECKA, A., BERA, S.,  
1377 JAWORSKI, J. & HAUCKE, V. 2017. Retrograde transport of TrkB-containing  
1378 autophagosomes via the adaptor AP-2 mediates neuronal complexity and  
1379 prevents neurodegeneration. *Nat Commun*, 8, 14819.  
1380 KREBS, C. E., KARKHEIRAN, S., POWELL, J. C., CAO, M., MAKAROV, V.,  
1381 DARVISH, H., DI PAOLO, G., WALKER, R. H., SHAHIDI, G. A., BUXBAUM, J.  
1382 D., DE CAMILLI, P., YUE, Z. Y. & PAISAN-RUIZ, C. 2013. The Sac1 Domain of  
1383 SYNJ1 Identified Mutated in a Family with Early-Onset Progressive Parkinsonism  
1384 with Generalized Seizures. *Human Mutation*, 34, 1200-1207.  
1385 KULKARNI, A., CHEN, J. & MADAY, S. 2018. Neuronal autophagy and  
1386 intercellular regulation of homeostasis in the brain. *Curr Opin Neurobiol*, 51, 29-  
1387 36.  
1388 LIANG, Q. Q., YANG, P. G., TIAN, E., HAN, J. H. & ZHANG, H. 2012. The C.  
1389 elegans ATG101 homolog EPG-9 directly interacts with EPG-1/Atg13 and is  
1390 essential for autophagy. *Autophagy*, 8, 1426-1433.  
1391 LIANG, Y. & SIGRIST, S. 2018. Autophagy and proteostasis in the control of  
1392 synapse aging and disease. *Curr Opin Neurobiol*, 48, 113-121.  
1393 LU, Q., YANG, P., HUANG, X., HU, W., GUO, B., WU, F., LIN, L., KOVACS, A.  
1394 L., YU, L. & ZHANG, H. 2011. The WD40 repeat PtdIns(3)P-binding protein  
1395 EPG-6 regulates progression of omegasomes to autophagosomes. *Dev Cell*, 21,  
1396 343-57.  
1397 LYNCH-DAY, M. A., MAO, K., WANG, K., ZHAO, M. & KLIONSKY, D. J. 2012.  
1398 The role of autophagy in Parkinson's disease. *Cold Spring Harb Perspect Med*, 2,  
1399 a009357.

- 1400 MADAY, S., WALLACE, K. E. & HOLZBAUR, E. L. 2012. Autophagosomes  
1401 initiate distally and mature during transport toward the cell soma in primary  
1402 neurons. *J Cell Biol*, 196, 407-17.
- 1403 MAEDA, S., YAMAMOTO, H., KINCH, L. N., GARZA, C. M., TAKAHASHI, S.,  
1404 OTOMO, C., GRISHIN, N. V., FORLI, S., MIZUSHIMA, N. & OTOMO, T. 2020.  
1405 Structure, lipid scrambling activity and role in autophagosome formation of  
1406 ATG9A. *Nat Struct Mol Biol*.
- 1407 MANIL-SEGALAN, M., LEFEBVRE, C., JENZER, C., TRICHET, M.,  
1408 BOULOGNE, C., SATIAT-JEUNEMAITRE, B. & LEGOUIS, R. 2014. The C.  
1409 elegans LC3 acts downstream of GABARAP to degrade autophagosomes by  
1410 interacting with the HOPS subunit VPS39. *Dev Cell*, 28, 43-55.
- 1411 MANNING, L. & RICHMOND, J. 2015. High-Pressure Freeze and Freeze  
1412 Substitution Electron Microscopy in *C. elegans*. *Methods Mol Biol*, 1327, 121-40.
- 1413 MATOBA, K., KOTANI, T., TSUTSUMI, A., TSUJI, T., MORI, T., NOSHIRO, D.,  
1414 SUGITA, Y., NOMURA, N., IWATA, S., OHSUMI, Y., FUJIMOTO, T.,  
1415 NAKATOGAWA, H., KIKKAWA, M. & NODA, N. N. 2020. Atg9 is a lipid  
1416 scramblase that mediates autophagosomal membrane expansion. *Nat Struct Mol*  
1417 *Biol*.
- 1418 MATOBA, K. & NODA, N. N. 2020. Secret of Atg9: lipid scramblase activity  
1419 drives de novo autophagosome biogenesis. *Cell Death Differ*.
- 1420 MATTERA, R., PARK, S. Y., DE PACE, R., GUARDIA, C. M. & BONIFACINO, J.  
1421 S. 2017. AP-4 mediates export of ATG9A from the trans-Golgi network to  
1422 promote autophagosome formation. *Proc Natl Acad Sci U S A*, 114, E10697-  
1423 E10706.
- 1424 MENZIES, F. M., FLEMING, A., CARICASOLE, A., BENTO, C. F., ANDREWS,  
1425 S. P., ASHKENAZI, A., FULLGRABE, J., JACKSON, A., JIMENEZ SANCHEZ,  
1426 M., KARABIYIK, C., LICITRA, F., LOPEZ RAMIREZ, A., PAVEL, M., PURI, C.,  
1427 RENNA, M., RICKETTS, T., SCHLOTAWA, L., VICINANZA, M., WON, H., ZHU,  
1428 Y., SKIDMORE, J. & RUBINSZTEIN, D. C. 2017. Autophagy and  
1429 Neurodegeneration: Pathogenic Mechanisms and Therapeutic Opportunities.  
1430 *Neuron*, 93, 1015-1034.
- 1431 MENZIES, F. M., FLEMING, A. & RUBINSZTEIN, D. C. 2015. Compromised  
1432 autophagy and neurodegenerative diseases. *Nat Rev Neurosci*, 16, 345-57.
- 1433 MILOSEVIC, I., GIOVEDI, S., LOU, X., RAIMONDI, A., COLLESI, C., SHEN, H.,  
1434 PARADISE, S., O'TOOLE, E., FERGUSON, S., CREMONA, O. & DE CAMILLI,  
1435 P. 2011. Recruitment of endophilin to clathrin-coated pit necks is required for  
1436 efficient vesicle uncoating after fission. *Neuron*, 72, 587-601.
- 1437 MURDOCH, J. D., ROSTOSKY, C. M., GOWRISANKARAN, S., ARORA, A. S.,  
1438 SOUKUP, S. F., VIDAL, R., CAPECE, V., FREYTAG, S., FISCHER, A.,  
1439 VERSTREKEN, P., BONN, S., RAIMUNDO, N. & MILOSEVIC, I. 2016.  
1440 Endophilin-A Deficiency Induces the Foxo3a-Fbxo32 Network in the Brain and  
1441 Causes Dysregulation of Autophagy and the Ubiquitin-Proteasome System. *Cell*  
1442 *Rep*, 17, 1071-1086.
- 1443 NAKATSU, F. & OHNO, H. 2003. Adaptor protein complexes as the key  
1444 regulators of protein sorting in the post-Golgi network. *Cell Structure and*  
1445 *Function*, 28, 419-429.

1446 NALLS, M. A., PANKRATZ, N., LILL, C. M., DO, C. B., HERNANDEZ, D. G.,  
1447 SAAD, M., DESTEFANO, A. L., KARA, E., BRAS, J., SHARMA, M., SCHULTE,  
1448 C., KELLER, M. F., AREPALLI, S., LETSON, C., EDSALL, C., STEFANSSON,  
1449 H., LIU, X., PLINER, H., LEE, J. H., CHENG, R., INTERNATIONAL  
1450 PARKINSON'S DISEASE GENOMICS, C., PARKINSON'S STUDY GROUP  
1451 PARKINSON'S RESEARCH: THE ORGANIZED, G. I., ANDME, GENEPD,  
1452 NEUROGENETICS RESEARCH, C., HUSSMAN INSTITUTE OF HUMAN, G.,  
1453 ASHKENAZI JEWISH DATASET, I., COHORTS FOR, H., AGING RESEARCH  
1454 IN GENETIC, E., NORTH AMERICAN BRAIN EXPRESSION, C., UNITED  
1455 KINGDOM BRAIN EXPRESSION, C., GREEK PARKINSON'S DISEASE, C.,  
1456 ALZHEIMER GENETIC ANALYSIS, G., IKRAM, M. A., IOANNIDIS, J. P.,  
1457 HADJIGEORGIOU, G. M., BIS, J. C., MARTINEZ, M., PERLMUTTER, J. S.,  
1458 GOATE, A., MARDER, K., FISKE, B., SUTHERLAND, M., XIROMERISIOU, G.,  
1459 MYERS, R. H., CLARK, L. N., STEFANSSON, K., HARDY, J. A., HEUTINK, P.,  
1460 CHEN, H., WOOD, N. W., HOULDEN, H., PAYAMI, H., BRICE, A., SCOTT, W.  
1461 K., GASSER, T., BERTRAM, L., ERIKSSON, N., FOROUD, T. & SINGLETON,  
1462 A. B. 2014. Large-scale meta-analysis of genome-wide association data  
1463 identifies six new risk loci for Parkinson's disease. *Nat Genet*, 46, 989-993.  
1464 NODA, T. 2017. Autophagy in the context of the cellular membrane-trafficking  
1465 system: the enigma of Atg9 vesicles. *Biochemical Society Transactions*, 45,  
1466 1323-1331.  
1467 OHASHI, Y. & MUNRO, S. 2010. Membrane Delivery to the Yeast  
1468 Autophagosome from the Golgi-Endosomal System. *Molecular Biology of the*  
1469 *Cell*, 21, 3998-4008.  
1470 PAIX, A., FOLKMANN, A. & SEYDOUX, G. 2017. Precision genome editing  
1471 using CRISPR-Cas9 and linear repair templates in *C. elegans*. *Methods*, 121, 86-  
1472 93.  
1473 PARK, S. Y. & GUO, X. 2014. Adaptor protein complexes and intracellular  
1474 transport. *Biosci Rep*, 34.  
1475 POPOVIC, D. & DIKIC, I. 2014. TBC1D5 and the AP2 complex regulate ATG9  
1476 trafficking and initiation of autophagy. *EMBO Rep*, 15, 392-401.  
1477 PURI, C., RENNA, M., BENTO, C. F., MOREAU, K. & RUBINSZTEIN, D. C.  
1478 2013. Diverse autophagosome membrane sources coalesce in recycling  
1479 endosomes. *Cell*, 154, 1285-99.  
1480 PURI, C., RENNA, M., BENTO, C. F., MOREAU, K. & RUBINSZTEIN, D. C.  
1481 2014. ATG16L1 meets ATG9 in recycling endosomes: additional roles for the  
1482 plasma membrane and endocytosis in autophagosome biogenesis. *Autophagy*,  
1483 10, 182-4.  
1484 QUADRI, M., FANG, M., PICILLO, M., OLGATI, S., BREEDVELD, G. J.,  
1485 GRAAFLAND, J., WU, B., XU, F., ERRO, R., AMBONI, M., PAPPATA, S.,  
1486 QUARANTELLI, M., ANNESI, G., QUATTRONE, A., CHIEN, H. F., BARBOSA,  
1487 E. R., INTERNATIONAL PARKINSONISM GENETICS, N., OOSTRA, B. A.,  
1488 BARONE, P., WANG, J. & BONIFATI, V. 2013. Mutation in the SYNJ1 gene  
1489 associated with autosomal recessive, early-onset Parkinsonism. *Hum Mutat*, 34,  
1490 1208-15.

1491 RAIMONDI, A., FERGUSON, S. M., LOU, X., ARMBRUSTER, M., PARADISE,  
1492 S., GIOVEDI, S., MESSA, M., KONO, N., TAKASAKI, J., CAPPELLO, V.,  
1493 O'TOOLE, E., RYAN, T. A. & DE CAMILLI, P. 2011. Overlapping role of dynamin  
1494 isoforms in synaptic vesicle endocytosis. *Neuron*, 70, 1100-14.  
1495 REGGIORI, F., SHINTANI, T., NAIR, U. & KLIONSKY, D. J. 2005. Atg9 cycles  
1496 between mitochondria and the pre-autophagosomal structure in yeasts.  
1497 *Autophagy*, 1, 101-109.  
1498 REGGIORI, F., TUCKER, K. A., STROMHAUG, P. E. & KLIONSKY, D. J. 2004.  
1499 The Atg1-Atg13 complex regulates Atg9 and Atg23 retrieval transport from the  
1500 pre-autophagosomal structure. *Developmental Cell*, 6, 79-90.  
1501 RICHMOND, J. E., DAVIS, W. S. & JORGENSEN, E. M. 1999. UNC-13 is  
1502 required for synaptic vesicle fusion in C-elegans. *Nature Neuroscience*, 2, 959-  
1503 964.  
1504 ROSTAING, P., WEIMER, R. M., JORGENSEN, E. M., TRILLER, A. &  
1505 BESSEREAU, J. L. 2004. Preservation of immunoreactivity and fine structure of  
1506 adult C. elegans tissues using high-pressure freezing. *J Histochem Cytochem*,  
1507 52, 1-12.  
1508 ROUT, M. P. & FIELD, M. C. 2017. The Evolution of Organellar Coat Complexes  
1509 and Organization of the Eukaryotic Cell. *Annu Rev Biochem*, 86, 637-657.  
1510 SAHEKI, Y. & DE CAMILLI, P. 2012. Synaptic vesicle endocytosis. *Cold Spring*  
1511 *Harb Perspect Biol*, 4, a005645.  
1512 SAWA-MAKARSKA, J., BAUMANN, V., COUDEVYLLE, N., VON BULOW, S.,  
1513 NOGELLOVA, V., ABERT, C., SCHUSCHNIG, M., GRAEF, M., HUMMER, G. &  
1514 MARTENS, S. 2020. Reconstitution of autophagosome nucleation defines Atg9  
1515 vesicles as seeds for membrane formation. *Science*, 369.  
1516 SCHINDELIN, J., ARGANDA-CARRERAS, I., FRISE, E., KAYNIG, V.,  
1517 LONGAIR, M., PIETZSCH, T., PREIBISCH, S., RUEDEN, C., SAALFELD, S.,  
1518 SCHMID, B., TINEVEZ, J. Y., WHITE, D. J., HARTENSTEIN, V., ELICEIRI, K.,  
1519 TOMANCAK, P. & CARDONA, A. 2012. Fiji: an open-source platform for  
1520 biological-image analysis. *Nat Methods*, 9, 676-82.  
1521 SCHREIJ, A. M., FON, E. A. & MCPHERSON, P. S. 2016. Endocytic membrane  
1522 trafficking and neurodegenerative disease. *Cell Mol Life Sci*, 73, 1529-45.  
1523 SEKITO, T., KAWAMATA, T., ICHIKAWA, R., SUZUKI, K. & OHSUMI, Y. 2009.  
1524 Atg17 recruits Atg9 to organize the pre-autophagosomal structure. *Genes Cells*,  
1525 14, 525-38.  
1526 SHEHATA, M., MATSUMURA, H., OKUBO-SUZUKI, R., OHKAWA, N. &  
1527 INOKUCHI, K. 2012. Neuronal Stimulation Induces Autophagy in Hippocampal  
1528 Neurons That Is Involved in AMPA Receptor Degradation after Chemical Long-  
1529 Term Depression. *Journal of Neuroscience*, 32, 10413-10422.  
1530 SON, J. H., SHIM, J. H., KIM, K. H., HA, J. Y. & HAN, J. Y. 2012. Neuronal  
1531 autophagy and neurodegenerative diseases. *Exp Mol Med*, 44, 89-98.  
1532 SOUKUP, S. F., KUENEN, S., VANHAUWAERT, R., MANETSBERGER, J.,  
1533 HERNANDEZ-DIAZ, S., SWERTS, J., SCHOOVAERTS, N., VILAIN, S.,  
1534 GOUNKO, N. V., VINTS, K., GEENS, A., DE STROOPER, B. & VERSTREKEN,  
1535 P. 2016. A LRRK2-Dependent EndophilinA Phosphoswitch Is Critical for  
1536 Macroautophagy at Presynaptic Terminals. *Neuron*, 92, 829-844.

- 1537 STAVOE, A. K. H., HILL, S. E., HALL, D. H. & COLON-RAMOS, D. A. 2016.  
1538 KIF1A/UNC-104 Transports ATG-9 to Regulate Neurodevelopment and  
1539 Autophagy at Synapses. *Developmental Cell*, 38, 171-185.
- 1540 STAVOE, A. K. H. & HOLZBAUR, E. L. F. 2019. Axonal autophagy: Mini-review  
1541 for autophagy in the CNS. *Neurosci Lett*, 697, 17-23.
- 1542 SUDHOF, T. C. 1995. The synaptic vesicle cycle: a cascade of protein-protein  
1543 interactions. *Nature*, 375, 645-53.
- 1544 SUZUKI, K., KIRISAKO, T., KAMADA, Y., MIZUSHIMA, N., NODA, T. &  
1545 OHSUMI, Y. 2001. The pre-autophagosomal structure organized by concerted  
1546 functions of APG genes is essential for autophagosome formation. *EMBO J*, 20,  
1547 5971-81.
- 1548 TRINH, J. & FARRER, M. 2013. Advances in the genetics of Parkinson disease.  
1549 *Nature Reviews Neurology*, 9, 445-454.
- 1550 TSUKADA, M. & OHSUMI, Y. 1993. Isolation and characterization of autophagy-  
1551 defective mutants of *Saccharomyces cerevisiae*. *FEBS Lett*, 333, 169-74.
- 1552 VAN DER VAART, A. & REGGIORI, F. 2010. The Golgi complex as a source for  
1553 yeast autophagosomal membranes. *Autophagy*, 6, 800-801.
- 1554 VANHAUWAERT, R., KUENEN, S., MASIUS, R., BADEMOSI, A.,  
1555 MANETSBERGER, J., SCHOOVAERTS, N., BOUNTI, L., GONTCHARENKO,  
1556 S., SWERTS, J., VILAIN, S., PICILLO, M., BARONE, P., MUNSHI, S. T., DE  
1557 VRIJ, F. M., KUSHNER, S. A., GOUNKO, N. V., MANDEMAKERS, W.,  
1558 BONIFATI, V., MEUNIER, F. A., SOUKUP, S. F. & VERSTREKEN, P. 2017. The  
1559 SAC1 domain in synaptojanin is required for autophagosome maturation at  
1560 presynaptic terminals. *EMBO J*, 36, 1392-1411.
- 1561 VERSTREKEN, P., KOH, T. W., SCHULZE, K. L., ZHAI, R. G., HIESINGER, P.  
1562 R., ZHOU, Y., MEHTA, S. Q., CAO, Y., ROOS, J. & BELLEN, H. J. 2003.  
1563 Synaptojanin is recruited by Endophilin to promote synaptic vesicle uncoating.  
1564 *Neuron*, 40, 733-748.
- 1565 VIDYADHARA, D. J., LEE, J. E. & CHANDRA, S. S. 2019. Role of the  
1566 endolysosomal system in Parkinson's disease. *Journal of Neurochemistry*, 150,  
1567 487-506.
- 1568 VIJAYAN, V. & VERSTREKEN, P. 2017. Autophagy in the presynaptic  
1569 compartment in health and disease. *J Cell Biol*, 216, 1895-1906.
- 1570 WANG, T., MARTIN, S., PAPADOPULOS, A., HARPER, C., MAVLYUTOV, T.,  
1571 NIRANJAN, D., GLASS, N., COOPER-WHITE, J., SIBARITA, J. B., CHOQUET,  
1572 D., DAVLETOV, B. & MEUNIER, F. 2015. Control of autophagosome axonal  
1573 retrograde flux by presynaptic activity unveiled using botulinum neurotoxin type-  
1574 A. *Journal of Neurochemistry*, 134, 165-165.
- 1575 WATANABE, S., TRIMBUCH, T., CAMACHO-PEREZ, M., ROST, B. R.,  
1576 BROKOWSKI, B., SOHL-KIELCZYNSKI, B., FELIES, A., DAVIS, M. W.,  
1577 ROSENMUND, C. & JORGENSEN, E. M. 2014. Clathrin regenerates synaptic  
1578 vesicles from endosomes. *Nature*, 515, 228-33.
- 1579 WEBBER, J. L., YOUNG, A. R. J. & TOOZE, S. A. 2007. Atg9 trafficking in  
1580 mammalian cells. *Autophagy*, 3, 54-56.

1581 WHITE, J. G., SOUTHGATE, E., THOMSON, J. N. & BRENNER, S. 1986. The  
1582 structure of the nervous system of the nematode *Caenorhabditis elegans*. *Philos*  
1583 *Trans R Soc Lond B Biol Sci*, 314, 1-340.

1584 WU, F., WATANABE, Y., GUO, X. Y., QI, X., WANG, P., ZHAO, H. Y., WANG,  
1585 Z., FUJIOKA, Y., ZHANG, H., REN, J. Q., FANG, T. C., SHEN, Y. X., FENG, W.,  
1586 HU, J. J., NODA, N. N. & ZHANG, H. 2015. Structural Basis of the Differential  
1587 Function of the Two *C. elegans* Atg8 Homologs, LGG-1 and LGG-2, in  
1588 Autophagy. *Mol Cell*, 60, 914-29.

1589 YAMAMOTO, H., KAKUTA, S., WATANABE, T. M., KITAMURA, A., SEKITO, T.,  
1590 KONDO-KAKUTA, C., ICHIKAWA, R., KINJO, M. & OHSUMI, Y. 2012. Atg9  
1591 vesicles are an important membrane source during early steps of  
1592 autophagosome formation. *Journal of Cell Biology*, 198, 219-233.

1593 YORIMITSU, T. & KLIONSKY, D. J. 2005. Autophagy: molecular machinery for  
1594 self-eating. *Cell Death Differ*, 12 Suppl 2, 1542-52.

1595 ZAVODSZKY, E., SEAMAN, M. N., MOREAU, K., JIMENEZ-SANCHEZ, M.,  
1596 BREUSEGEM, S. Y., HARBOUR, M. E. & RUBINSZTEIN, D. C. 2014. Mutation  
1597 in VPS35 associated with Parkinson's disease impairs WASH complex  
1598 association and inhibits autophagy. *Nat Commun*, 5, 3828.

1599 ZHOU, C., MA, K., GAO, R., MU, C., CHEN, L., LIU, Q., LUO, Q., FENG, D.,  
1600 ZHU, Y. & CHEN, Q. 2017. Regulation of mATG9 trafficking by Src- and ULK1-  
1601 mediated phosphorylation in basal and starvation-induced autophagy. *Cell Res*,  
1602 27, 184-201.

1603

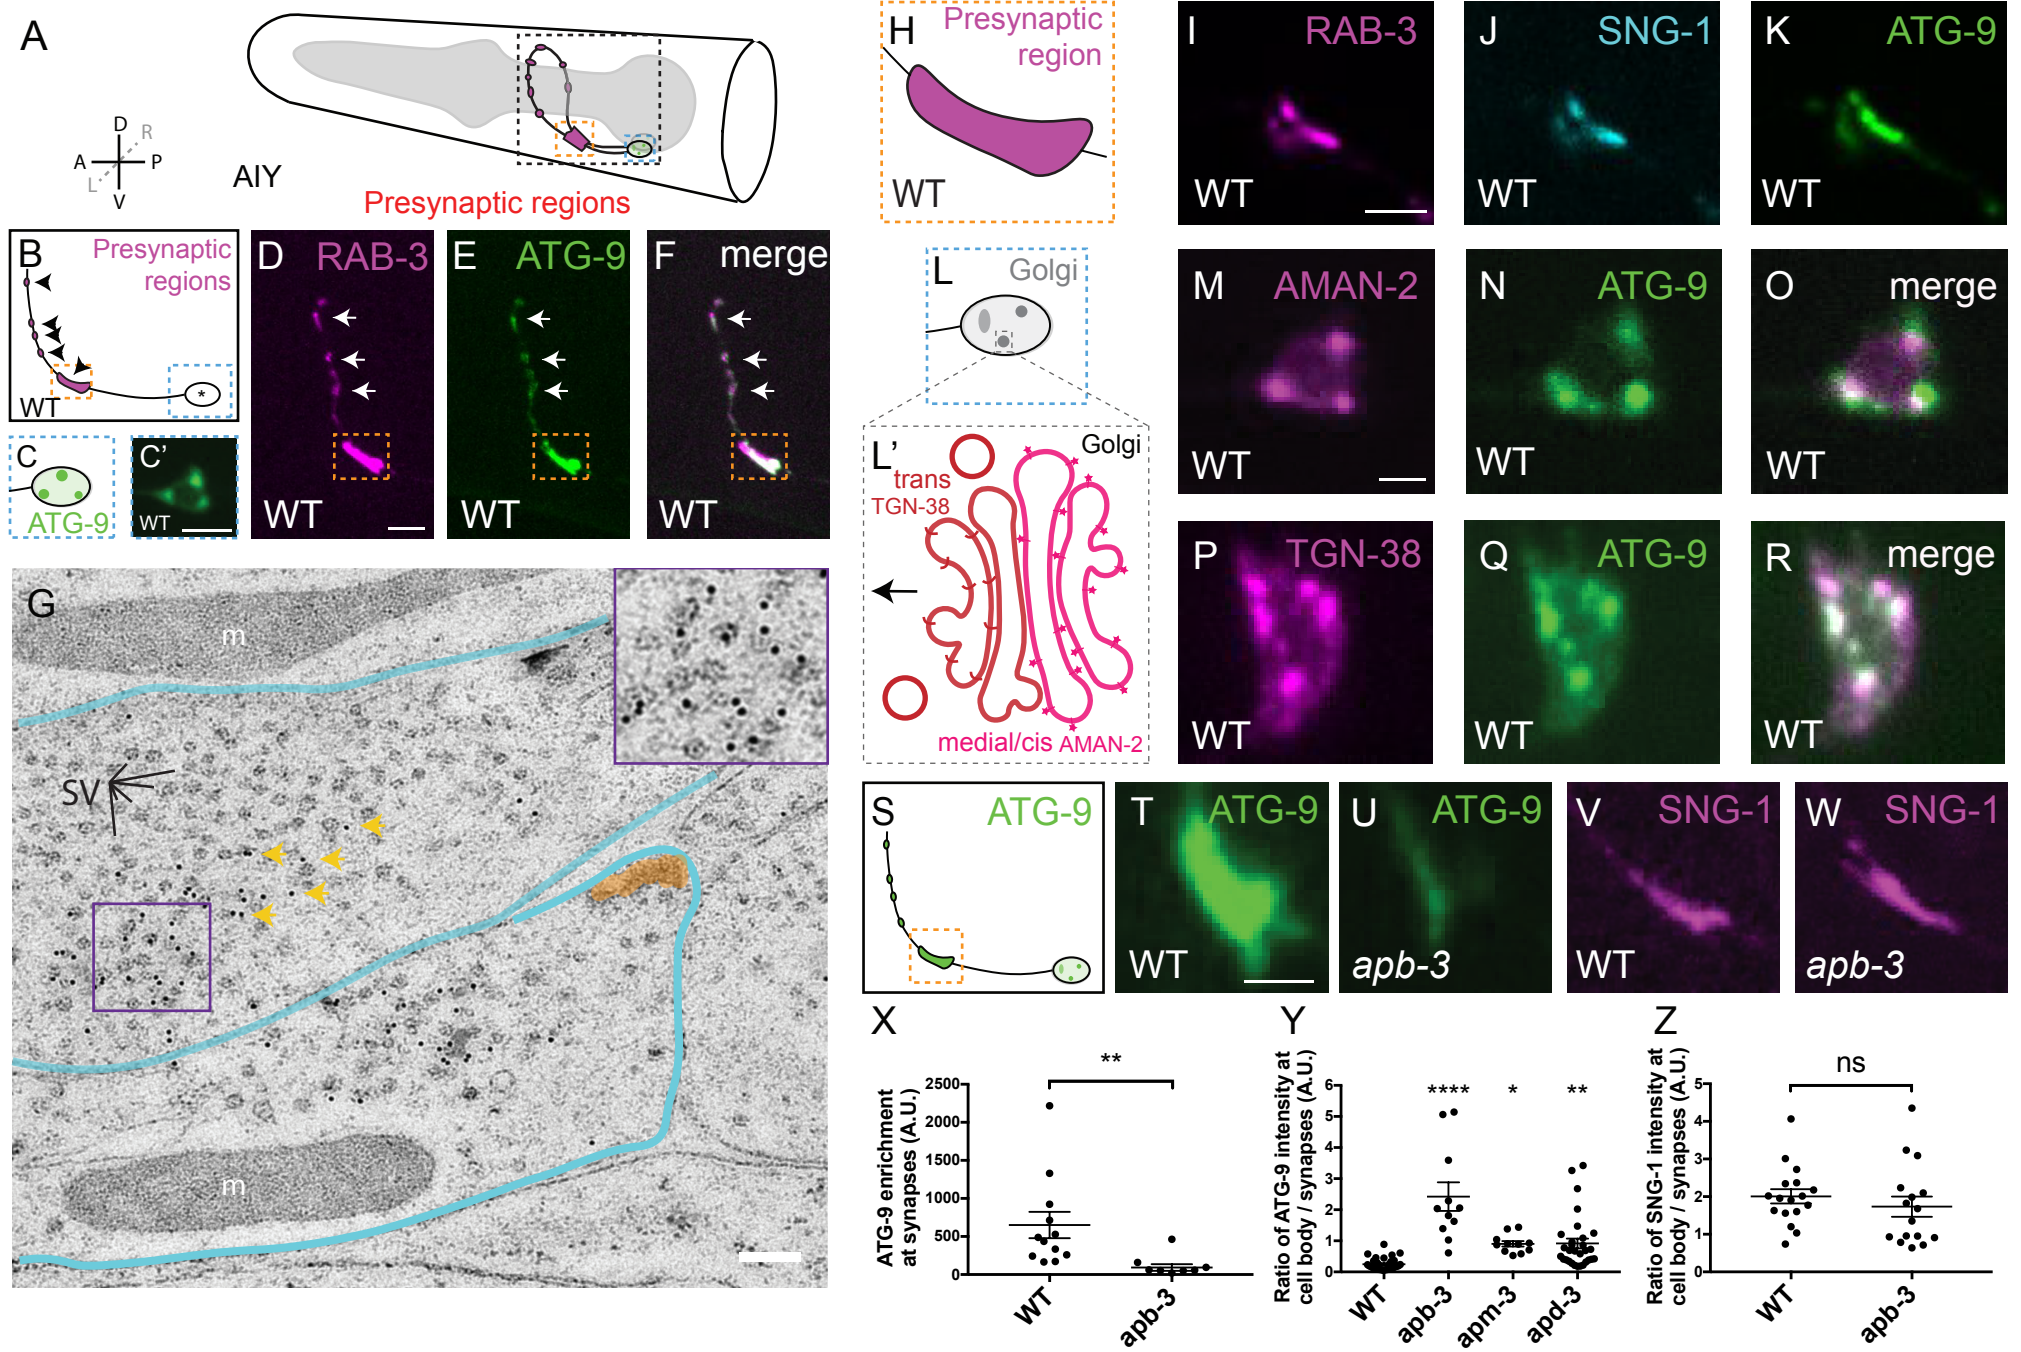

Figure 1

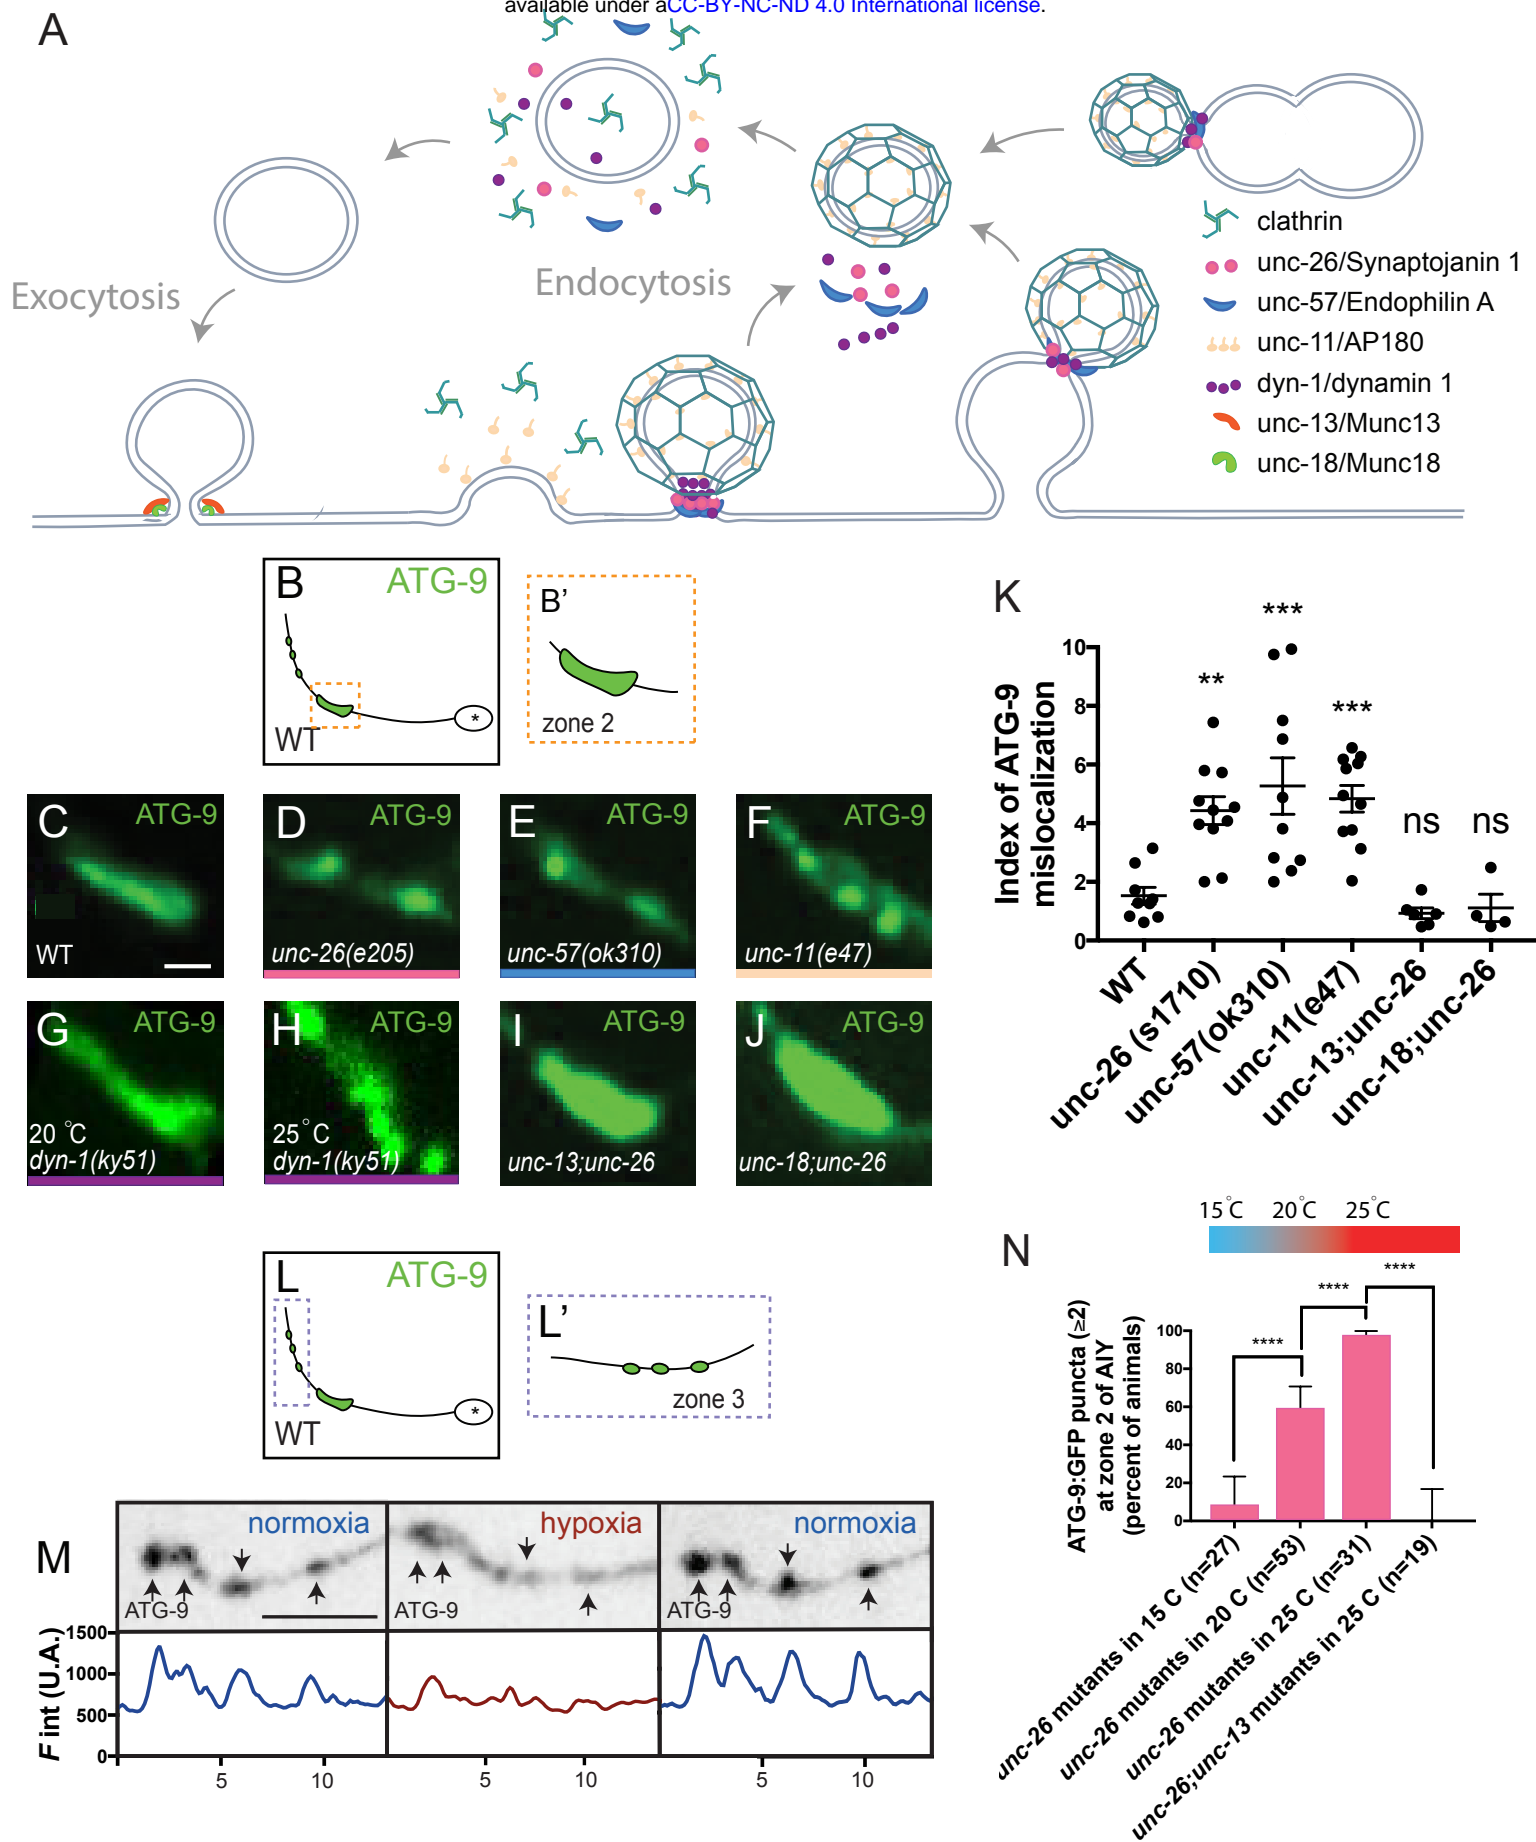

Figure 2



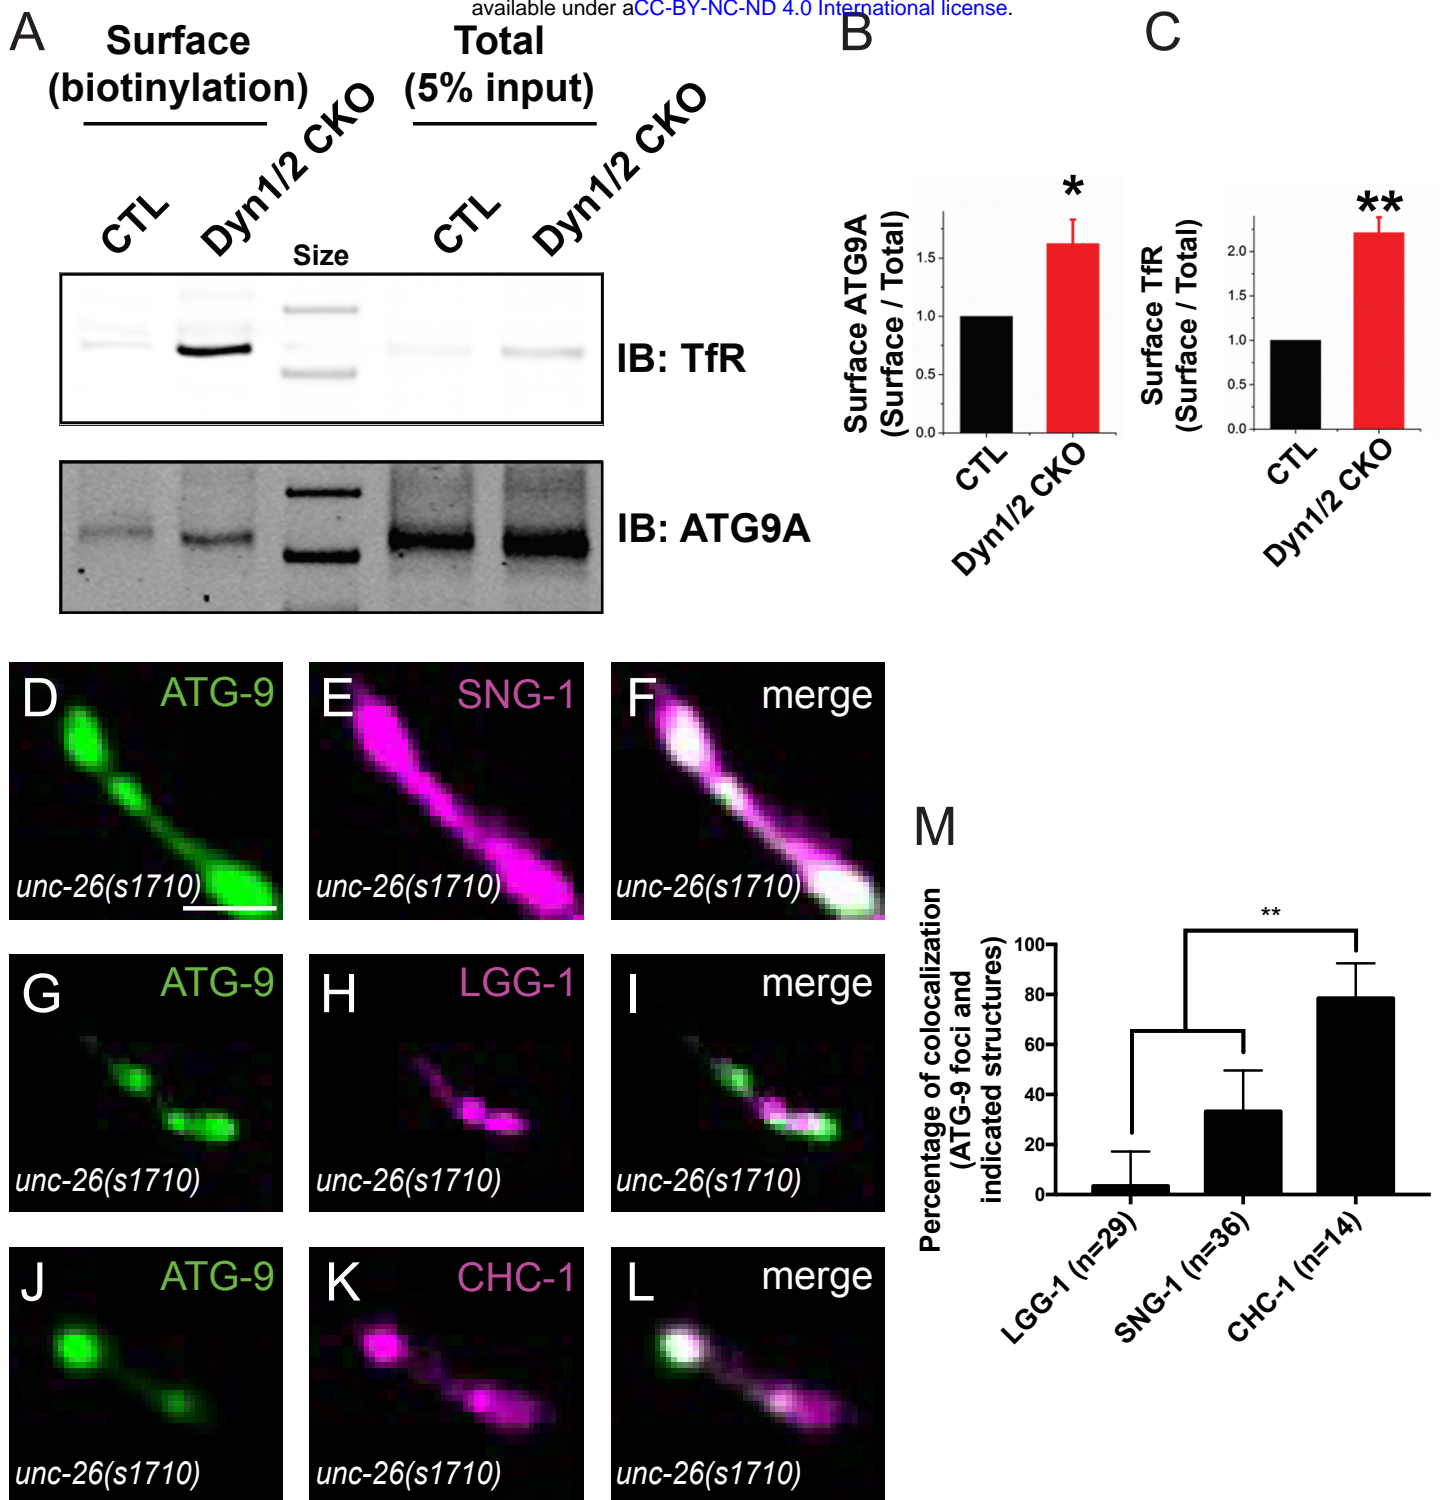

Figure 3

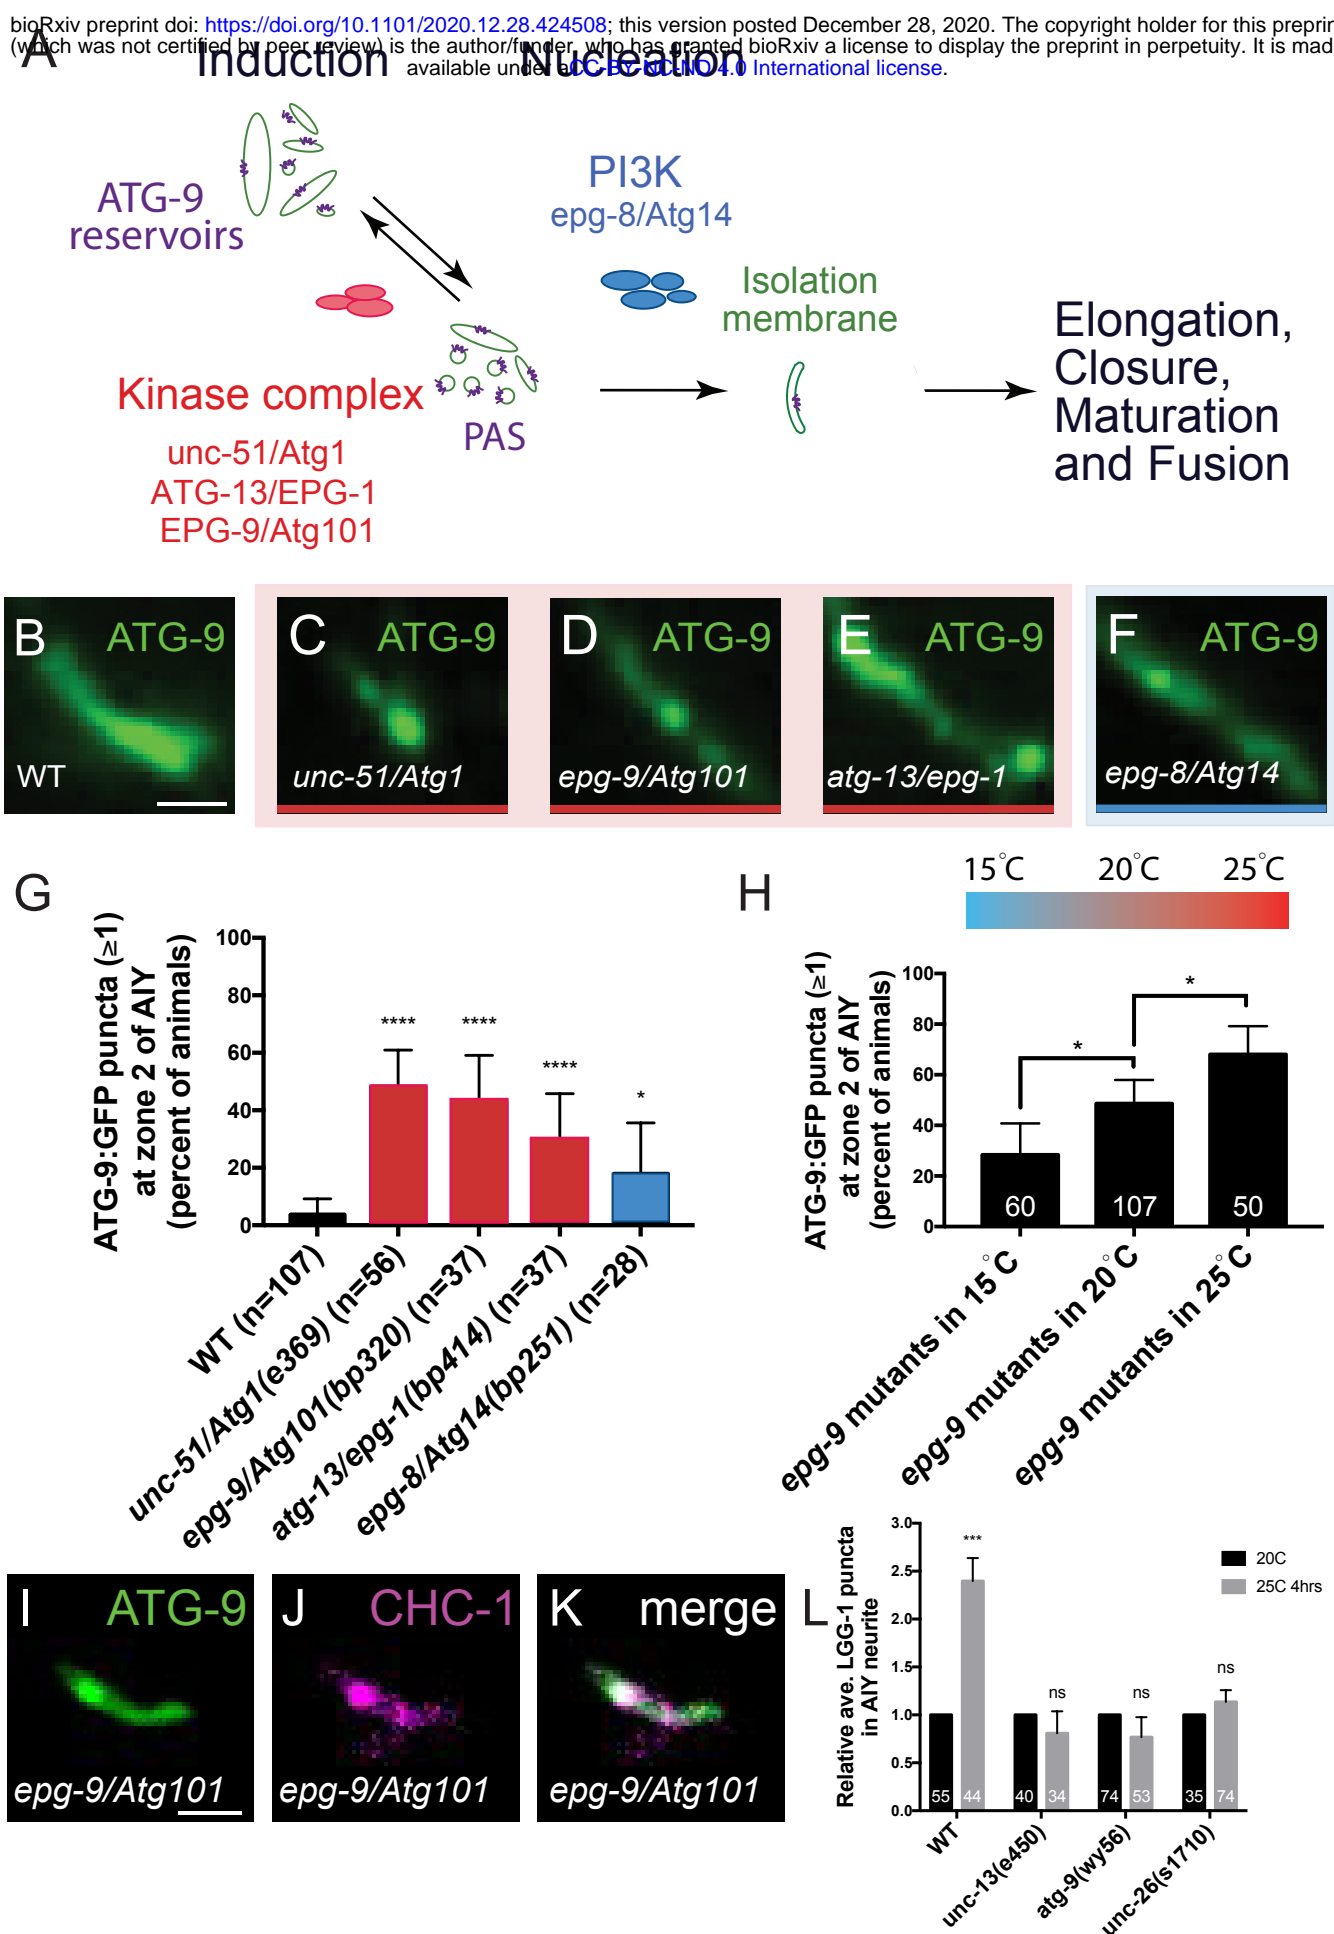

Figure 4

Cultured hippocampal neurons

IF: ATG9A

IF: amphiphysin2

WT

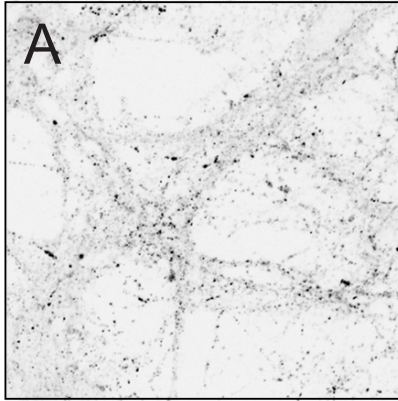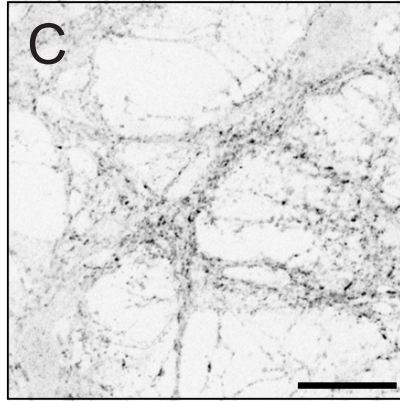

Dyn1/3 KO

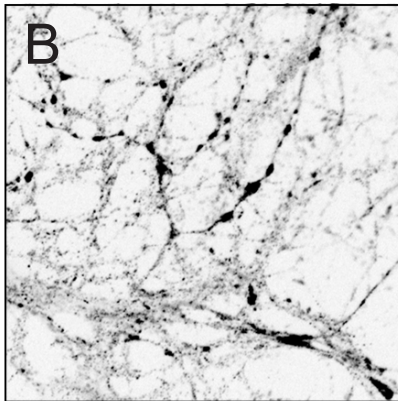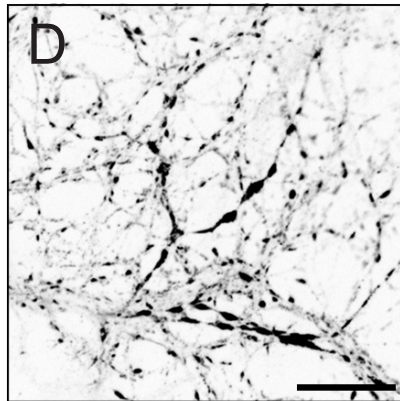

Cultured hippocampal neurons

IF: ATG9A

IF: amphiphysin2

WT

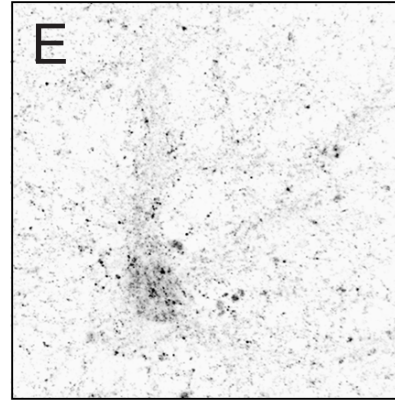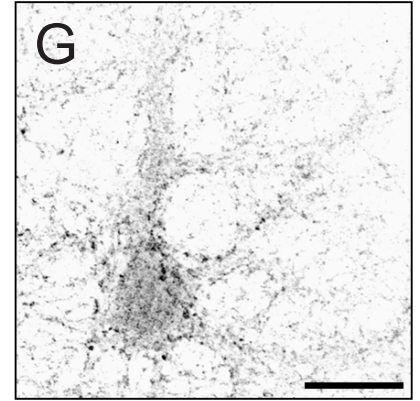

SJ1 KO

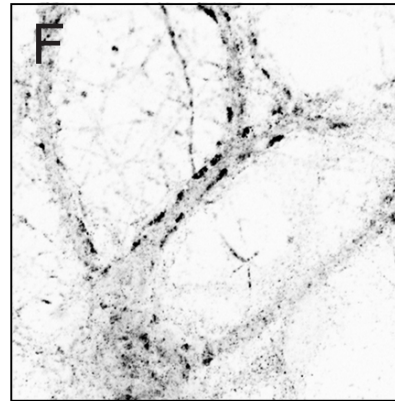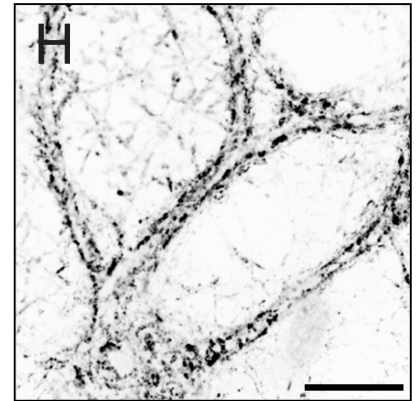

Figure 5

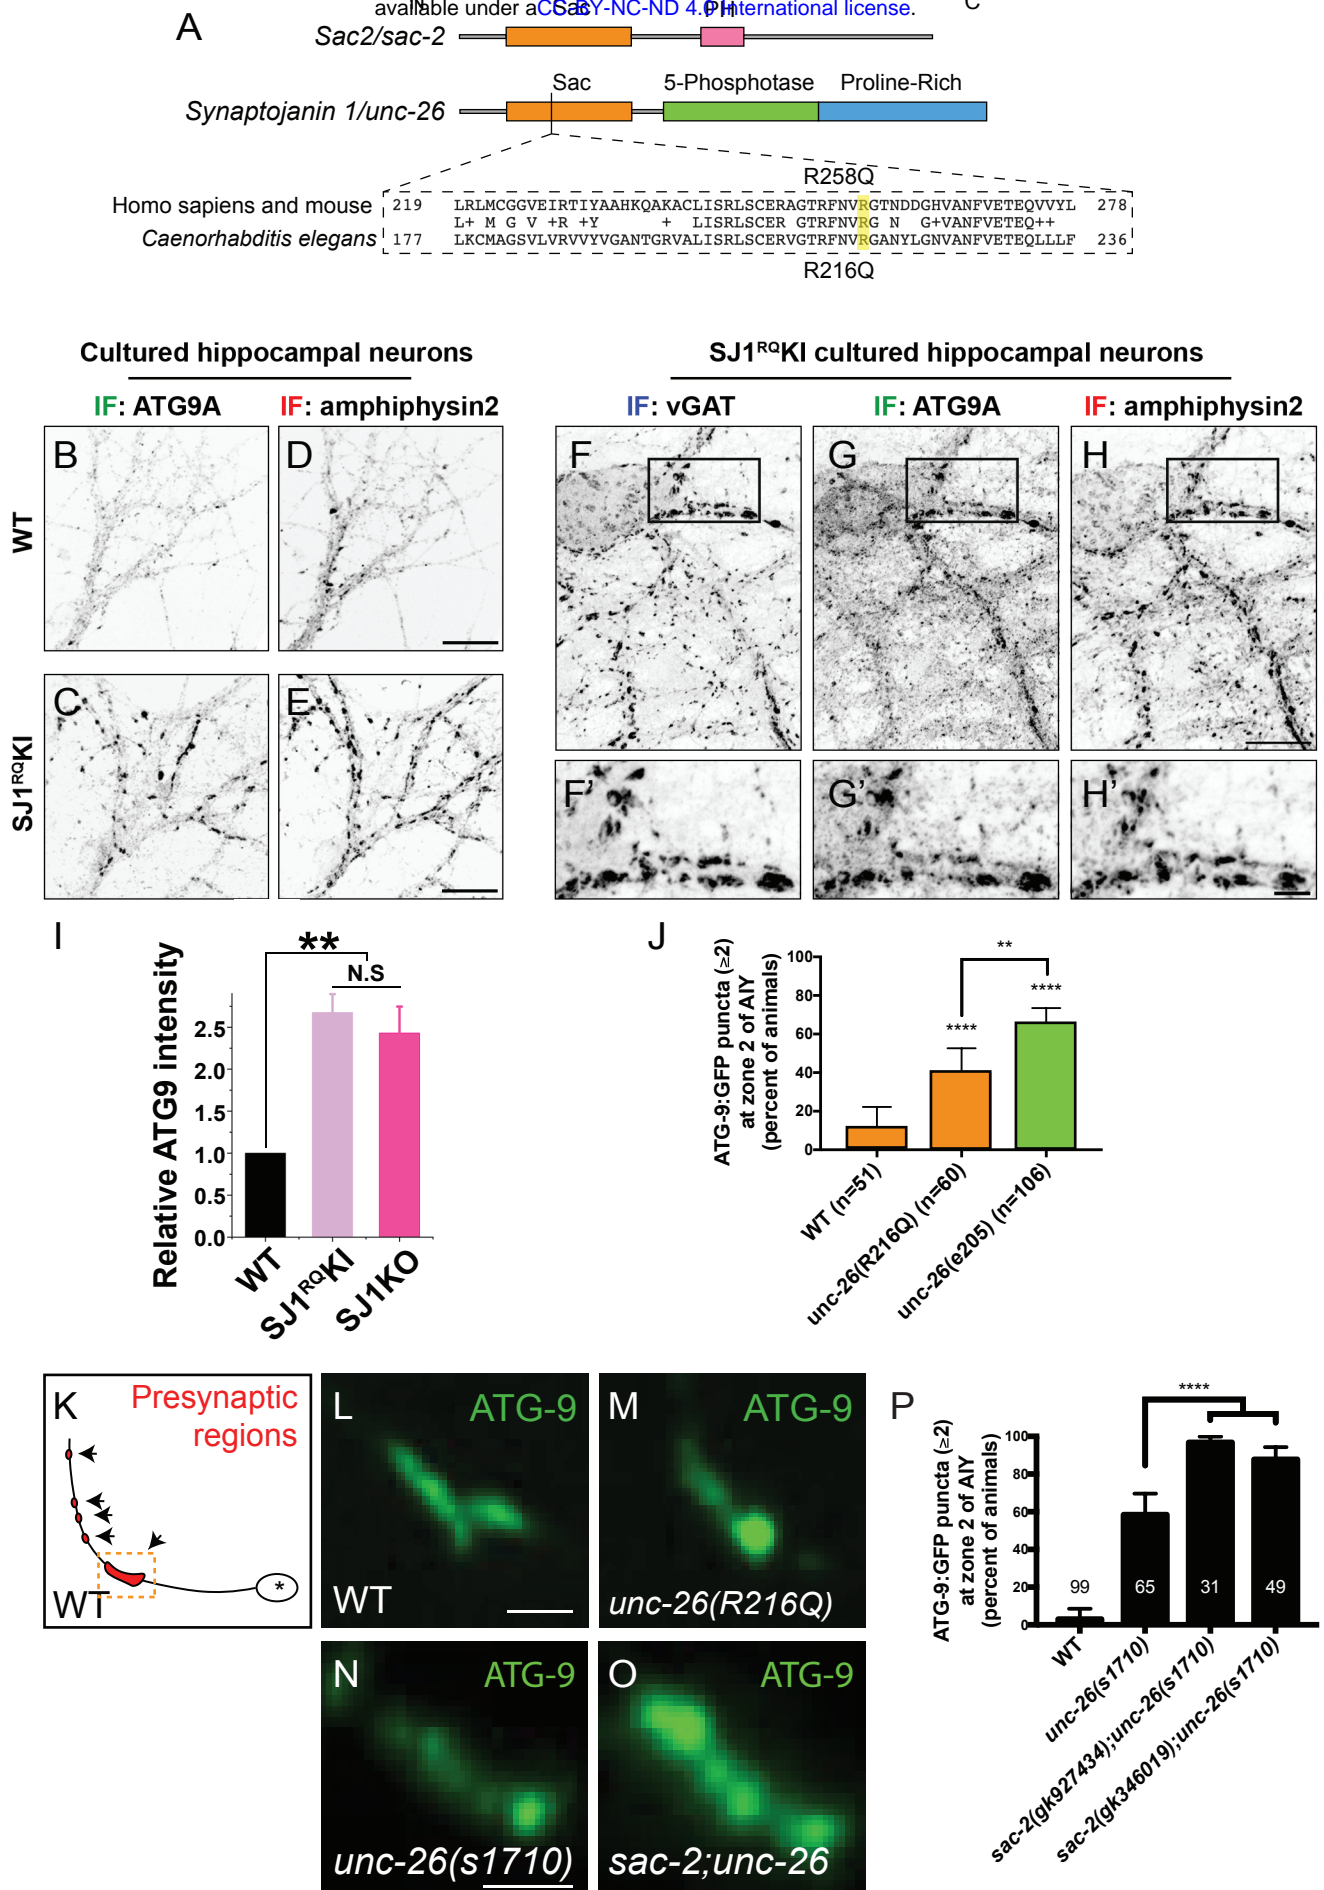

Figure 6

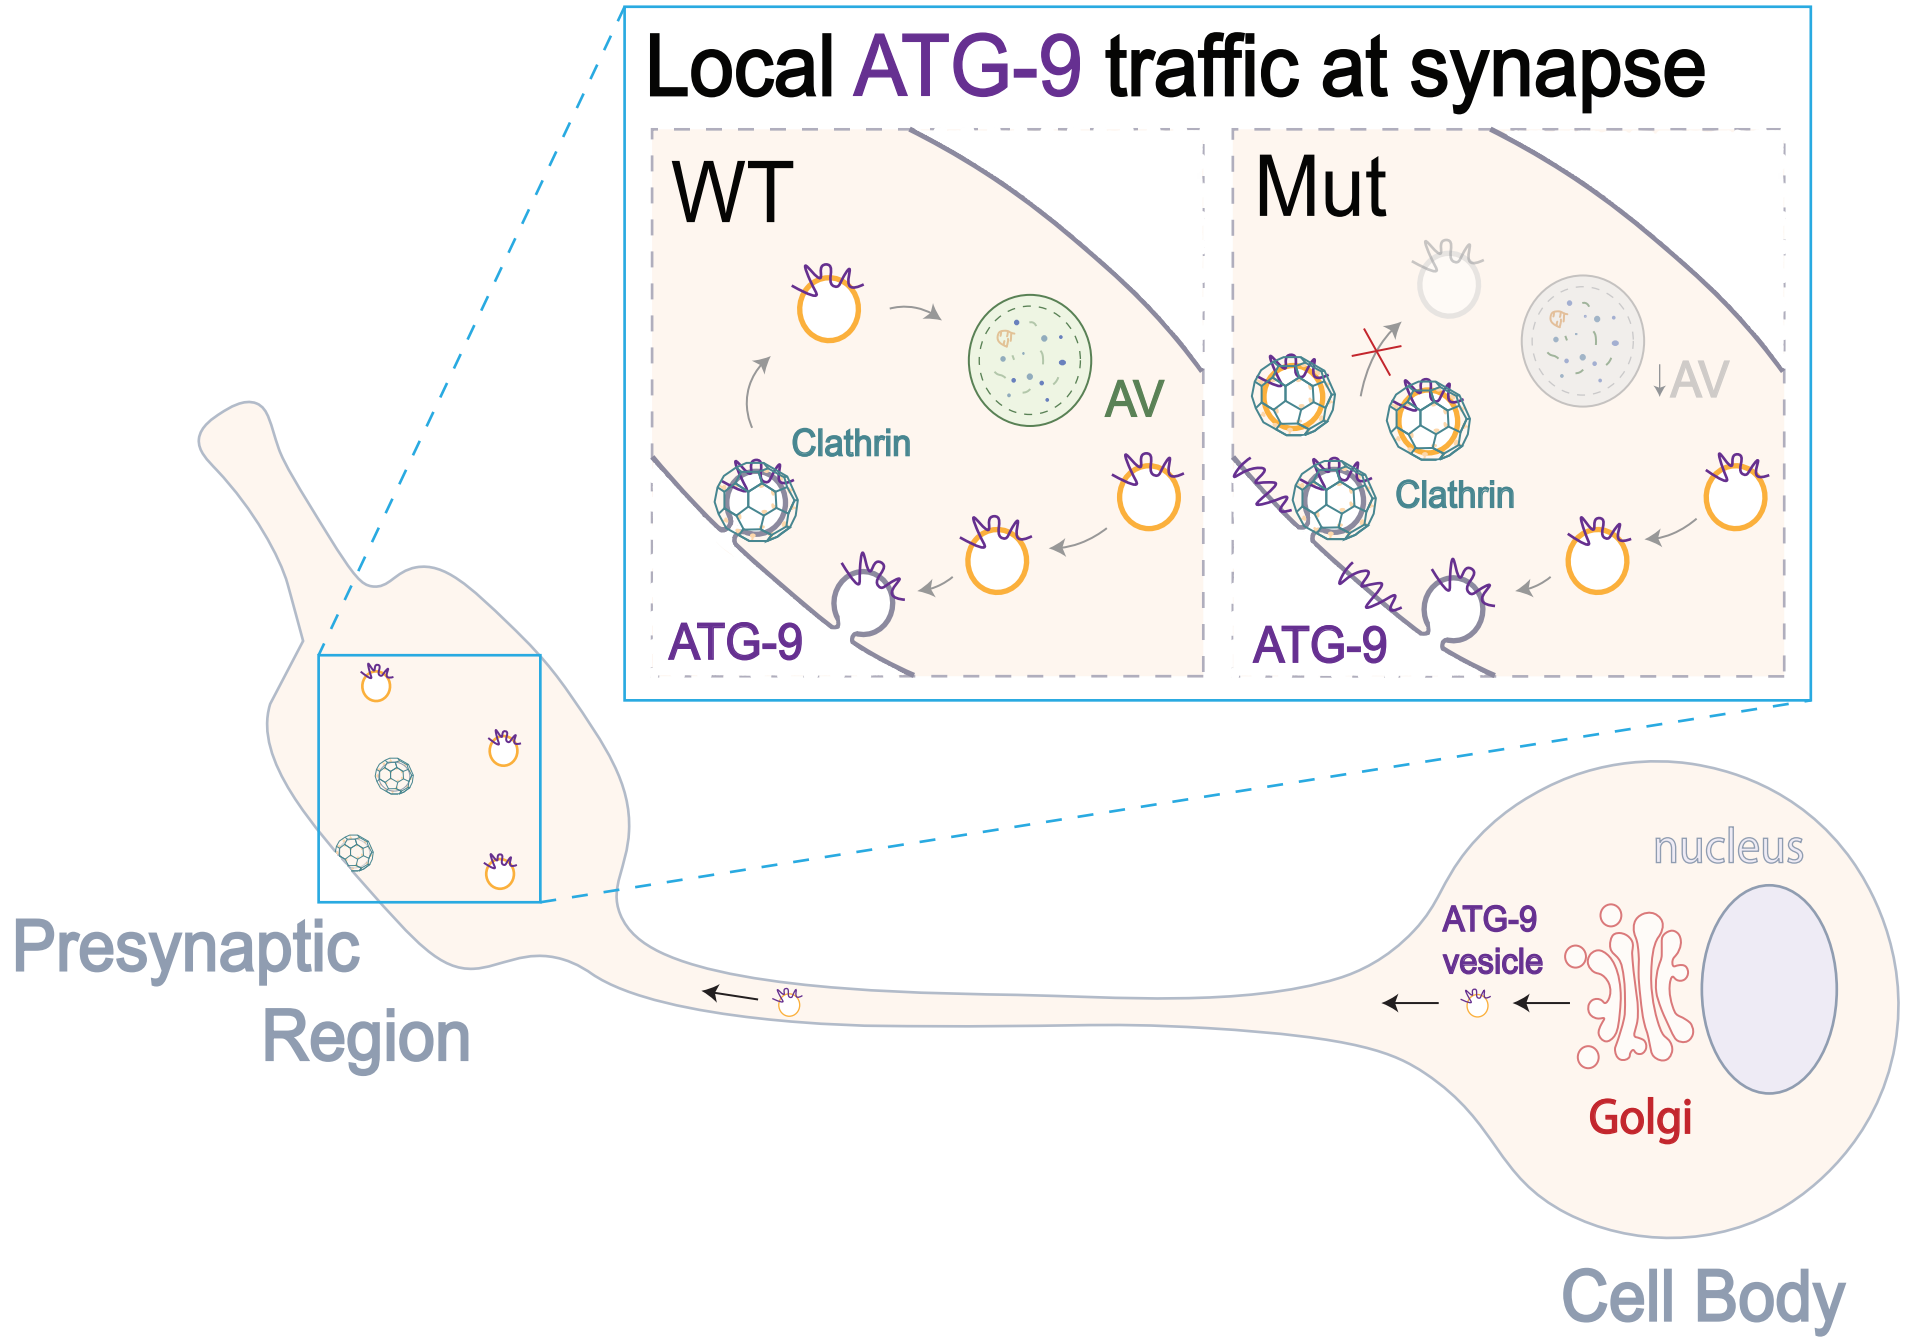

Figure 7
